1 **p63 sets the threshold for induction of apoptosis using a kinetically encoded ‘doorbell-**  
2 **like’ mechanism**

3

4 Jakob Gebel<sup>1,X</sup>, Marcel Tuppi<sup>1,7,X,\*</sup>, Apirat Chaikuad<sup>2,X</sup>, Katharina Hötte<sup>3</sup>, Laura Schulz<sup>4</sup>, Frank  
5 Löhr<sup>1</sup>, Niklas Gutfreund<sup>1</sup>, Franziska Finke<sup>1</sup>, Martin Schröder<sup>2</sup>, Erik Henrich<sup>1</sup>, Julija Mezhyrova<sup>1</sup>,  
6 Ralf Lehnert<sup>5</sup>, Francesco Pampaloni<sup>3</sup>, Gerhard Hummer<sup>4,6</sup>, Ernst H.K. Stelzer<sup>3</sup>, Stefan Knapp<sup>2</sup>,  
7 Volker Dötsch<sup>1,\*</sup>

8 <sup>1</sup>Institute of Biophysical Chemistry and Center for Biomolecular Magnetic Resonance and  
9 Cluster of Excellence Macromolecular Complexes (CEF), Goethe University, Frankfurt/Main,  
10 Germany.

11 <sup>2</sup>Institute of Pharmaceutical Chemistry, Goethe University, Frankfurt/Main, 60438; Germany.

12 <sup>3</sup>Physical Biology/Physikalische Biologie (IZN, FB 15), Buchmann Institute for Molecular Life  
13 Sciences (BMLS), Goethe University, Frankfurt, Germany.

14 <sup>4</sup>Department of Theoretical Biophysics, Max Planck Institute of Biophysics, 60438 Frankfurt  
15 am Main, Germany.

16 <sup>5</sup>Mathezentrum, Goethe University, Frankfurt, Germany.

17 <sup>6</sup>Institute of Biophysics, Goethe University Frankfurt, 60438 Frankfurt am Main, Germany.

18 <sup>7</sup>Current address: The Francis Crick Institute, London, NW11ST, UK

19

20 <sup>X</sup>These authors contributed equally to this work

21 <sup>\*</sup>Corresponding authors. Institute of Biophysical Chemistry, Centre for Biomolecular Magnetic  
22 Resonance, University of Frankfurt, Max-von-Laue-Strasse 9, 60438 Frankfurt/Main,  
23 Germany. Tel.: +49 69 798 29631; Fax: +49 69 798 29632; vdoetsch@em.uni-frankfurt.de or  
24 The Francis Crick Institute, London, NW11ST, UK, marcel.tuppi@crick.ac.uk

25 Lead contact: vdoetsch@em.uni-frankfurt.de

26

27 **Keywords:** p63, p53 family, tetramerization, phosphorylation, CHK2, CK1, DNA damage,  
28 quality control, ovarian reserve, premature ovarian insufficiency, light sheet microscopy

29

30 **Abbreviations:** DSBs, DNA double strand breaks; POI, premature ovarian insufficiency; TAD,  
31 transactivation domain; DBD, DNA binding domain; TD, tetramerization domain; SAM, sterile  
32 alpha motif; PAD, phosphorylation activation domain; TID, transcriptional inhibitory domain;  
33 NMR, nuclear magnetic resonance; Dox, doxorubicin; CHK2, checkpoint kinase 2; CK1,  
34 casein kinase 1; Cs, Cisplatin; PARP 1, poly(ADP-ribose)-polymerase; DSBs, double strand  
35 breaks;

36

37 **Abstract**

38 Cell fate decisions such as apoptosis require cells to translate signaling input into a binary  
39 yes/no response. A tight control of the process is required to avoid loss of cells by accidental  
40 activation of cell death pathways. One particularly critical situation exists in primary oocytes  
41 because their finite number determines the reproductive capacity of females. On the one hand  
42 a stringent genetic quality control is necessary to maintain the genetic integrity of the entire  
43 species; on the other hand an overly stringent mechanism that kills oocytes with even minor  
44 DNA damage can deplete the whole primary oocyte pool leading to infertility. The p53 homolog  
45 TAp63 $\alpha$  is the key regulator of genome integrity in oocytes. After DNA damage TAp63 $\alpha$  is  
46 activated by multistep phosphorylation involving multiple phosphorylation events by the kinase  
47 CK1, which triggers the transition from a dimeric and inactive conformation to an open and  
48 active tetramer. By measuring activation kinetics in ovaries and single site phosphorylation  
49 kinetics *in vitro* with peptides and full length protein we show that TAp63 $\alpha$  phosphorylation  
50 follows a biphasic behavior. While the first two CK1 phosphorylation events are fast, the third  
51 one that constitutes the decisive step to form the active conformation is slow. We reveal the  
52 structural mechanism for the difference in the kinetic behavior based on an unusual  
53 CK1/TAp63 $\alpha$  substrate interaction and demonstrate by quantitative simulation that the slow  
54 phosphorylation phase determines the threshold of DNA damage required for induction of  
55 apoptosis.

## 56 INTRODUCTION

57 The reproductive lifespan of women is determined by the primordial follicle (PF) reserve. PFs  
58 consist of primary oocytes surrounded by a single flat layer of granulosa cells. These oocytes  
59 are arrested in prophase I of meiosis I until being recruited for ovulation. Menopause is initiated  
60 in humans when the number of PFs decreases from its original level of one to two million at  
61 the time of birth to below 1000<sup>1</sup>. Depletion of the PF reserve was identified as the major cause  
62 for premature ovarian insufficiency (POI). In female patients suffering from cancer, sickle cell  
63 anemia or certain autoimmune diseases, treatment with chemotherapeutic drugs and/or  
64 irradiation can deplete the ovarian reserve, resulting in POI<sup>2,3</sup>. Fewer than ten DNA double  
65 strand breaks (DSBs) ( $\gamma$ -irradiation with 0.45 Gy) are suffice to eliminate the entire PF reserve  
66 in mice<sup>4</sup>. In humans, the LD<sub>50</sub> total body irradiation dosage for the loss of the PF reserve was  
67 extrapolated to be less than 2 Gy, while the typical total body irradiation dose for acute  
68 leukemia patients is 12 Gy<sup>5,6</sup>. The loss of the PF reserve also causes the breakdown of the  
69 endocrine function of the ovary resulting in addition to infertility in health impairments like  
70 osteoporosis, cardiovascular disease and psychosocial disorders in addition to infertility<sup>7</sup>. In  
71 contrast to the arrested PFs, growing follicles are unaffected from low dosage of irradiation.  
72 The decisive difference between both oocyte types is the expression of TAp63 $\alpha$ , a p53  
73 orthologue, in PFs<sup>4,8</sup>. The expression of TAp63 $\alpha$  starts shortly after the pachytene stage of  
74 meiosis I while oocytes that have reentered the cell cycle are devoid of TAp63 $\alpha$ <sup>4</sup>.  
75 The high levels of the pro-apoptotic factor TAp63 $\alpha$  combined with the long arrest time of  
76 oocytes (up to 50 years in humans) require a very tight regulation of TAp63 $\alpha$ 's activity to avoid  
77 cell death of uncompromised oocytes. In contrast to all other members of the p53 family that  
78 form tetramers through an oligomerization domain, TAp63 $\alpha$  adopts a closed, inactive and only  
79 dimeric conformation<sup>9</sup>. DNA damage triggers a kinase cascade resulting in the phosphorylation  
80 of TAp63 $\alpha$ , which disrupts the autoinhibitory dimeric complex and triggers the formation of an  
81 open active and tetrameric conformation resulting in the elimination of the damaged oocyte<sup>10</sup>.  
82 Recently, we and others have identified the kinases involved in this process, mapped the  
83 phosphorylation sites and described the structural mechanism of the activation process. The  
84 first step of the kinase cascade is the activation of checkpoint kinase 2 (CHK2) or checkpoint  
85 kinase 1 (CHK1) by ataxia telangiectasia mutant kinase (ATM)<sup>11</sup>. Activated CHK2  
86 phosphorylates TAp63 $\alpha$  on S582<sup>12</sup> which renders TAp63 $\alpha$  a substrate for casein kinase 1  
87 (CK1)<sup>13</sup>. CK1 requires pre-phosphorylated substrates with the consensus sequence pS/T-x-x-  
88 S/T, where pS/T is a phosphorylated serine or threonine. In TAp63 $\alpha$  CK1 adds four phosphate  
89 groups that lead to the disruption of the autoinhibitory complex through electrostatic  
90 repulsion<sup>13</sup>. Our previous experiments have shown that the inhibited dimeric state of TAp63 $\alpha$   
91 constitutes a kinetically trapped high energy state<sup>14</sup>. Consequently, activation follows a spring-  
92 loaded mechanism that explains the high sensitivity of oocytes towards DNA damage. This

93 activation mechanism has to be adjusted to a certain level of damage that on the one hand  
94 must be sufficiently low to protect the integrity of the genetic pool of a species but on the other  
95 hand tolerant enough not to endanger reproductive capacity. This situation requires a  
96 mechanism that ideally works similar to a doorbell: an input signal (mechanical pressure) below  
97 a certain threshold has no effect. If, however, this threshold is surpassed the output signal is  
98 independent of the actual input signal strength (pressing harder does not make the doorbell  
99 louder). Indeed, a tight dose-response curve has been measured in four-day old mice: while  
100 most oocytes survive irradiation with 0.1 Gy (~three DSBs per cell), virtually all primary oocytes  
101 were eliminated by 0.45 Gy irradiation (~ten DSBs per cell)<sup>4</sup>.

102 Switch-like processes are often based on the integration of two different and independent  
103 signals. An accidental activation is thus suppressed as the likelihood of activation is the product  
104 of two small probabilities. Examples include regulation of actin polymerization via N-WASP  
105 which requires co-stimulation by Cdc42 and PIP2<sup>15</sup> as well as activation of T-cells via triggering  
106 nuclear import of NFAT and activation of the transcription factor AP1<sup>16</sup>. The activation of  
107 TAp63 $\alpha$  is based on phosphorylation by two kinases which in principle could provide such a  
108 sigmoidal activation. However, both act in a sequentially dependent manner and CK1 kinases  
109 are thought to be constitutively active<sup>17</sup>. These properties would prevent a switch-like activation  
110 and make the initiation of apoptosis dependent only on CHK2 with potentially detrimental  
111 consequences for the safety of oocytes. To understand how TAp63 $\alpha$  converts a graded stress  
112 response into a doorbell like activation mechanism we investigated the kinetics of apoptosis in  
113 primary oocytes both at the cellular and molecular level.

## 114 **RESULTS**

### 115 **DNA damage induced apoptosis in primordial follicles follows a sigmoidal time** 116 **response**

117 We set out to measure the time dependent TAp63 $\alpha$  activation in whole mouse ovaries following  
118 DNA damage as a response to  $\gamma$ -irradiation (0.5 Gy) as a direct source of DSB induction. The  
119 tetramerization kinetics of TAp63 $\alpha$  upon  $\gamma$ -irradiation followed a sigmoidal time response with  
120 virtually all TAp63 $\alpha$  converted into its active tetrameric state within two hours (Fig. 1a, 1b and  
121 Supplementary Fig. 1a). Activation can be suppressed using selective inhibitors of ATM, CHK2  
122 and CK1, suggesting that tetramerization is based on the same pathway as activation following  
123 the treatment with cisplatin or doxorubicin (Supplementary Fig. 1a)<sup>13,14,18</sup>. In order to investigate  
124 the time dependent induction of apoptosis, we measured the ratio of germ cell nuclear acidic  
125 peptidase (GCNA)<sup>19</sup> positive and cleaved poly(ADP-ribose)-polymerase 1 (PARP1) double  
126 positive cells in whole mouse ovaries using our 3D staining and light sheet-based fluorescence  
127 microscopy combined with semi-automated segmentation method (Fig. 1c and Supplementary  
128 Fig. 1b)<sup>13</sup>. The primary oocyte specific GCNA<sup>10</sup> staining allows the specific quantification of  
129 apoptosis markers in primary oocytes. Cleaved PARP1 was detected starting from four hours  
130 after irradiation and reached 100% in the remaining PFs at ten hours showing a sigmoidal  
131 overall transition (Fig. 1d). A sigmoidal transition was also evident when monitoring the decline  
132 of the integrated GCNA signal in whole ovaries representing the total number of remaining  
133 primary oocytes (Fig. 1e).

134

### 135 **Phosphorylation of the third CK1 site is the slowest and the ‘point of no return’**

136 The correlation between the sigmoidal time response patterns for TAp63 $\alpha$  tetramerization and  
137 induction of apoptosis suggests that the molecular activation mechanism of TAp63 $\alpha$  is the  
138 decisive process controlling the fate of the oocyte. Earlier, we have shown that the initial  
139 phosphorylation of S582 by CHK2 is necessary but does not result in active TAp63 $\alpha$ . This  
140 phosphorylation serves as the priming event for recruiting CK1 which adds phosphate groups  
141 at four consecutive sites: S585, S588, S591 and T594<sup>13</sup>. We also have characterized the  
142 importance of each phosphate group for the activation mechanism by mutating the individual  
143 residues that can be phosphorylated to alanine and measuring the tetramerization kinetics  
144 following addition of CK1. Demonstrating that the last phosphorylation event, T594, is  
145 dispensable for TAp63 $\alpha$  activation. However, mutating S591 abrogates the conversion of  
146 TAp63 $\alpha$  to a tetramer, showing that phosphorylation of S591 is ‘the point of no return’ for  
147 TAp63 $\alpha$  activation<sup>13</sup>. This observation raised the question how phosphorylation of the three  
148 CK1 sites, S585, S588 and S591 can provide a switch-like activation mechanism. Detailed  
149 theoretical and experimental studies have shown that multisite phosphorylation can lead to  
150 ultrasensitivity<sup>20-22</sup>. This is achieved either by having strongly differing kinetic constants for the

151 individual reaction steps or if the process is distributive<sup>23</sup>. In addition, a distributive mode of  
152 action would allow the interference of a phosphatase while a processive mode of action would  
153 result in a continuous and undisturbed phosphorylation of all sites. To investigate the mode of  
154 action we analyzed the kinetics of phosphorylation of the individual sites within a peptide, that  
155 corresponds to the sequence N-terminal to the transactivation inhibitory domain (TID)<sup>24</sup> and  
156 includes the phosphorylation sites for CHK2 and CK1 (hereafter referred to as phosphorylation  
157 activation domain (PAD)) via nuclear magnetic resonance (NMR) spectroscopy.  
158 Phosphorylation of S582 by MapKap kinase 2 (MK2) which recognizes the same  
159 phosphorylation sequence as CHK2 resulted in the appearance of a new resonance in the  
160 HSQC spectrum and loss of the original S582 signal, consistent with the peptide being  
161 phosphorylated on this serine residue (Supplementary Fig. 2a). MK2 can be easily produced  
162 in bacteria, is constitutively active and therefore a convenient surrogate for CHK2 *in vitro*  
163 priming of substrates.

164 Recording the phosphorylation kinetics of this pre-phosphorylated peptide by CK1 $\delta$  showed a  
165 biphasic behavior. Phosphorylation of S585 and S588 occurred very quickly with an almost  
166 indistinguishable kinetics, which corresponds to either a processive mode or to a distributive  
167 mode with a very fast product releasing and substrate re-binding kinetics. A stark contrast was  
168 observed for the subsequent phosphorylation of S591 with a ~40-fold slower rate (Fig. 2a, 2B  
169 and Supplementary Table 1). The observed increase in the concentration of the triple  
170 phosphorylated peptide (pS582, pS585, pS588; PAD-3P) beyond the concentration of the  
171 kinase implies that CK1 must have dissociated from the PAD-3P product peptide to  
172 phosphorylate S585 and S588 in free PAD-1P and PAD-2P peptides. Only when the supply of  
173 pS582 mono-phosphorylated peptide is exhausted, S591 and T594 become substrates for  
174 CK1. We conclude from these observations that 1) phosphorylation of the entire stretch occurs  
175 via a distributive mode and that 2) S585 and S588 act as a buffer that delays phosphorylation  
176 of the downstream sites S591 and T594. In the same time frame as the phosphorylation of  
177 S591 and T594 a non-consensus sequence phosphorylation of T586 appears. The T586A  
178 mutant showed no difference in the phosphorylation kinetics demonstrating that  
179 phosphorylation of T586 is not the reason for the biphasic behavior (Supplementary Fig. 2h).  
180 Interestingly, phosphorylation of S591 is the point of no return for the activation and the kinetic  
181 experiment demonstrate that this critical phosphorylation is the slow step occurring in a  
182 distributive mode of action.

183 **The phosphorylation kinetics in the full-length protein mirrors the kinetics of the**  
184 **isolated peptides**

185 Phosphorylation kinetics of the isolated PAD peptide might, however, be quite different from  
186 the kinetics of the corresponding peptide within the closed dimeric full-length TAp63 $\alpha$   
187 conformation since the sequence is surrounded by secondary structure elements and folded  
188 domains (Fig. 2c). We measured the phosphorylation kinetics with <sup>15</sup>N-labeled full-length  
189 dimeric TAp63 $\alpha$ . To be able to analyze the phosphorylation kinetics by NMR we stopped the  
190 reaction by adding a high concentration of EDTA and CK1 inhibitor PF-670462. Subsequently,  
191 we isolated the PAD peptide first by cleaving with tobacco etch virus (TEV) protease and after  
192 isolating the resulting C-terminal fragment the PAD was cleaved from the TID using CNBr. For  
193 this purpose, a protease cleavage site was engineered N-terminal to the PAD and a V599M  
194 mutation at its C-terminal end (Supplementary Fig. 2b-g). The phosphorylation kinetics of the  
195 PAD peptide and the PAD derived from the dimeric TAp63 $\alpha$  showed a similar pattern. S585  
196 and S588 were phosphorylated fast, while phosphorylation of S591 and T594 were significantly  
197 slower (at least 25-fold) following a distributive mechanism (Fig. 2d and 2e). This demonstrated  
198 that the biphasic activation mode also occurs in the full-length dimeric TAp63 $\alpha$  and is not a  
199 peptide derived artefact.

200

201 **The biphasic kinetics is p63 sequence specific**

202 The observed biphasic behavior could be a property of the p63 sequence, of CK1 substrate  
203 recognition or a mixture of both properties. Kinases of the CK1 family recognize several  
204 hundred confirmed or suggested substrates. Among them are the period proteins (PER1-3),  
205  $\beta$ -catenin, NF-AT1,2,4, adenomatous polyposis coli (APC), p53, MDM2 and Yes-associated  
206 protein 1 (YAP1)<sup>17</sup>. Some of these targets contain stretches of phosphorylatable residues  
207 harboring the CK1 consensus target sequence and these sequences are known to get  
208 phosphorylated at multiple sites (Fig. 3a). To investigate if CK1 $\delta$  can in principle add more  
209 than two phosphate groups in a processive manner we chose YAP1 which contains a  
210 phosphodegron sequence that regulates its cellular localization and degradation. YAP1 is  
211 pre-phosphorylated by LATS kinase at S397, within the HxRxxS consensus motif. CK1 gets  
212 recruited to phosphorylated YAP1 and adds three more phosphate groups in the sequence  
213 HSRDESTDSGLSMSSYS<sup>25</sup>. We used a modified, MK2 phosphorylatable peptide and  
214 measured the NMR-based kinetics of the three CK1 phosphorylation events after MK2 priming  
215 (Fig. 3b, 3c, Supplementary Fig. 3a and 3b). In a stark contrast to the PAD peptide, the results  
216 demonstrated fast kinetics for all three CK1 sites, suggesting that CK1 phosphorylates the  
217 sequence in YAP1, and possibly other proteins, without a distinct biphasic mechanism (Fig.  
218 3d, 3e and Supplementary Table 1).

219 **The CK1 p63 PAD complex structure reveals the basis for the biphasic activation**  
220 **kinetics**

221 This result suggested that the p63 PAD sequence is responsible for the observed biphasic  
222 kinetics and we hypothesized that the residues C-terminal to the third CK1 phosphorylation  
223 site (S591) might be crucial. We exchanged the sequence following the third CK1 site S591  
224 (S592 and E593) with the sequence directly C-terminal to the second CK1 phosphorylation  
225 site S588 (V589 and G590). Interestingly, phosphorylation of S591 and T594 in this double  
226 mutant was indeed ten-fold accelerated in comparison to wild type. A faster phosphorylation  
227 kinetics was evident also in both single S592V and E593A mutants with a notably more  
228 pronounced effect observed for the S592V mutation (Fig. 3e, Supplementary Fig. 3c, 3d and  
229 Supplementary Table 1).

230 To obtain a mechanistic insight of the kinase–peptide interactions that are responsible for the  
231 delayed kinetics, we determined the crystal structures of the kinase domain of CK1 $\delta$  in  
232 complexes with AMPPCP/ADP and various PAD peptides harboring different phosphorylation  
233 states, including PAD-1P (the first substrate with primed phosphorylation at pS582), PAD-2P  
234 (pS582 and pS585) and PAD-3P (pS582, pS585 and pS588) (Supplementary Fig. 4a-f). The  
235 overall conformations of all bound peptides were highly similar, yet they captured different  
236 states, including the substrate-bound form in PAD-1P and PAD-2P having the S585 and S588,  
237 respectively, located at the catalytic site. In contrast to PAD-1P/2P the PAD-3P crystalized in  
238 a product-PAD-3P complex in which pS588 was positioned within the catalytic site (Fig. 4a, 4b  
239 and 4d). Structural analyses of the CK1 $\delta$ -PAD-2P complex as an example of the  
240 substrate-bound state revealed that the interactions between the kinase and the peptide were  
241 induced by electrostatic charge complementarity of both anchor-ends on the N- and C-termini  
242 of the peptide (Fig. 4c).

243 The peptide N-terminal part adopted a helical turn positioning the phosphate groups of pS582  
244 and pS585 into the basic pocket of the kinase formed by Arg178 and Lys224 (for clear  
245 referencing, the single amino acid letter code is used for the PAD peptide and the three-letter  
246 code for the CK1 $\delta$  kinase), while the PAD C-terminal E593 residue interacted with a second  
247 basic cluster present in the CK1 $\delta$  substrate binding groove. This second cluster was formed  
248 by the N-terminus of the activation segment of the kinase. Furthermore, a potential hydrogen  
249 bond between the PAD S592 and the backbone carbonyl of CK1 $\delta$  Ala153 was formed. The  
250 middle stretch of the PAD central to S588 at the catalytic site, displayed a canonical  
251 kinase-substrate interaction (Fig. 4c and 4d). Close inspection of the region surrounding the  
252 catalytic site revealed a non-polar patch on the kinase that was compatible with a  
253 medium-sized hydrophobic substrate residue such as V589 of the PAD peptide, which was  
254 tucked within a groove fenced on one side by the  $\alpha$ G of the kinase. This explains the preference  
255 for hydrophobic amino acids in CK substrates at the +1-position relative to the serine/threonine



256 phosphorylation site (Fig. 4c and 4d). In comparison, the binding mode of the PAD-3P in a  
257 product bound state highly resembles that of the substrate PAD-2P, albeit with the positioning  
258 of pS588 at the catalytic site with its phosphate moiety adjacent to the DFG Asp149 and the  
259 HRD Asp128 facilitated by an unusually bent ADP conformation (Fig. 4c and 4d). These  
260 structural insights from both substrate- and product-bound states suggested that such  
261 accommodation of the PAD peptides with S588/pS588 at the catalytic sites likely offered an  
262 optimal binding mode within the kinase, presenting the charge compatibility not only at N- and  
263 C-terminal anchor-points but also the non-polar groove for the middle part.

264 Processivity towards the next phosphorylation event on S591 requires the movement of the  
265 triple phosphorylated peptide by a translocation of S592 and E593 away from their favorable  
266 binding polar/charged pocket to the unfavorable hydrophobic environment, explaining the  
267 accelerated kinetics of the mutants (Fig. 3e). To further investigate this model, we measured  
268 the phosphorylation kinetics for the V589A mutant which replaces a large hydrophobic residue  
269 with a smaller one. This mutation indeed slowed phosphorylation of the second  
270 phosphorylation site ~three-fold probably by weakening the interaction with the small  
271 hydrophobic surface in the CK binding site. At the same time, the mutant V589A also  
272 accelerated phosphorylation of S591 approximately threefold (Fig. 3e, Supplementary Fig. 3c,  
273 3d and Supplementary Table 1). Replacing the medium sized hydrophobic valine residue with  
274 a smaller alanine probably weakened the interaction in this +1-substrate position, resulting in  
275 both suboptimal positioning and locking of the substrate and a smaller hurdle for the release  
276 of the product.

277 We further investigated the interaction between the kinase and the PAD peptide by all-atom  
278 molecular dynamics (MD) simulations. In 1  $\mu$ s long simulations with bound PAD, the side chain  
279 of E593 of the PAD peptide formed strong and persistent salt-bridge interactions with a basic  
280 cluster on CK1 formed by Arg127, Lys154 and Lys171 (Fig. 5a, 5b, Supplementary Fig. 5a and  
281 5b). By stabilizing the crystallographic position of the peptide, these interactions contribute to  
282 the slow phosphorylation rate of S591. This finding is consistent with a mutational analysis of  
283 the PAD peptide showing a ~two-fold acceleration for the E593A mutant (Fig. 3e,  
284 Supplementary Fig. 3c, 3d and Supplementary Table 1). Mutating the residues of the basic  
285 cluster on CK1 individually to glutamate and measuring the phosphorylation kinetics revealed  
286 that mutation of Lys154 and Lys171 resulted in a 1.5-fold faster kinetics of the third and fourth  
287 CK1 phosphorylation reactions (Supplementary Fig. 5c and 5d). These results confirmed the  
288 contribution of the interaction between E593 and the kinase to the slow phosphorylation rate  
289 of S591.

290 MD simulations also highlighted the stabilizing interactions of V589 on the PAD peptide with  
291 CK1. We compared two 1  $\mu$ s long simulations of the WT and V589A PAD peptide. The V589A  
292 mutation weakened the interactions with a hydrophobic patch on CK1 and increased the

293 flexibility of the peptide in this region (Fig. 5c and 5d). This finding is consistent with our  
294 mutational analysis, which showed that a large hydrophobic residue in the i+1-position retains  
295 the peptide and thereby slows down phosphorylation at the third CK1 site (Fig. 3e).

296 The presence of PAD-1P, PAD-2P and PAD-3P in the crystal structures suggests that all PAD  
297 peptides must have high binding affinities for CK1 $\delta$ . However, we hypothesized that they may  
298 not exhibit the same binding and/or substrate potencies. To investigate this hypothesis, we  
299 measured  $k_{cat}$ ,  $K_m$  and  $V_{max}$  values for the phosphorylation reaction starting with single, double  
300 or triple phosphorylated peptides by measuring ATP consumption. Since the experiment was  
301 conducted with the wild type peptide sequence and not serine to alanine mutants the obtained  
302 values represent average values for all remaining phosphorylation events. These  
303 measurements clearly demonstrate that the affinity of the peptides increases and the reaction  
304 velocity decreases with increasing phosphorylation level (Supplementary Fig. 5e).

305

### 306 **The phosphorylation kinetics of the third CK1 site sets the threshold level for activation** 307 **and oocyte death**

308 Beyond the mechanistic description of the activation process, the question of the biological  
309 purpose of the observed kinetics remains. Analysis of the phosphorylation kinetics both of the  
310 isolated peptide as well as the full-length protein showed that phosphorylation of the third CK1  
311 site starts only after the first two sites are completely phosphorylated (Fig. 2b and 2e). The first  
312 two sites act as a buffer creating a preloaded state and the third one acts as the trigger.  
313 Delaying the irreversible spring-loaded activation might allow the cell to survive in case the  
314 DNA damage does not surpass a certain threshold. This could be achieved by phosphatases  
315 that act during the delay period and remove the phosphorylation sites that constitute the buffer.  
316 One additional safety mechanism to control the fate of the oocyte is the degradation of  
317 activated TAp63 $\alpha$ . Analysis of the total TAp63 $\alpha$  concentration in oocytes has revealed that it  
318 decreases following the activation to the active tetrameric state<sup>4,9</sup>. A fast degradation in  
319 combination with a slow activation could also prevent apoptosis in case the DNA damage level  
320 is minor. To investigate the potential effects of dephosphorylation, degradation and delay of  
321 activation we simulated the entire process mathematically according to the kinetic model  
322 shown in Fig. 6a, Supplementary Fig. 6a and 6b. For simplicity, we used only one kinetic  
323 constant,  $k_1$ , to describe the phosphorylation by CHK2 and the first two CK1 phosphorylation  
324 events. The kinetic constants  $k_2$  and  $k_4$  describe the dephosphorylation and degradation  
325 processes while  $k_3$  represents the critical third CK1 phosphorylation event that converts the  
326 inactive, dimeric protein [B] into the open, active conformation [C]. We solved the indicated  
327 system of coupled differential equations by numerical integration for different values of the  
328 kinetic constants. In our *in vitro* phosphorylation experiments the value of  $k_1$  was constant  
329 depending only on the concentration of CK1. However, *in vivo*,  $k_1$  will change with time as it

330 depends for example on the amount of DNA damage, the activation kinetics of CHK2 as well  
331 as DNA repair processes. To better address this situation, we used different time-shifted  
332 curves as a description of the time dependence of the  $k_1$  value (Supplementary Fig. 6c, 6e and  
333 6g). This resulted in a shift in the time response curve of [C], reflecting the experimental data  
334 of p63 tetramerization in oocytes but had otherwise little effect on [C] (Supplementary Fig. 6d,  
335 6f and 6h). Changing the value for  $k_2$  also showed relatively little effect on the formation of the  
336 activated tetramer [C] (Fig. 6b). In contrast,  $k_4$  has a strong effect with high values keeping the  
337 concentration of activated tetramer low (Fig. 6c).

338 These simulations predict that phosphatases probably play a less important role than E3  
339 ligases in regulating of TAp63 $\alpha$  mediated oocytes death. To address the decisive question of  
340 the influence of the  $k_3$  kinetic constant we selected values for  $k_4$  based on the observed decay  
341 of the tetrameric p63 level in oocytes following irradiation ( $k_4=0.008 \text{ min}^{-1}$ ; Supplementary Fig.  
342 1a) and calculated the time course of the concentration of activated tetramer for low and high  
343 values of  $k_3$ . These calculations show a strong influence of the level of [C] on the value of  $k_3$   
344 (Fig. 6d). With  $k_3$  values approaching  $k_1$ , meaning that no lag phase in phosphorylation exists,  
345 a fast rise of [C] to high concentrations results. Slower  $k_3$  values dampen the response of the  
346 system and delay it, enabling the degradation process to effectively remove activated tetramer.  
347 To better characterize the effect of the phosphorylation lag phase we calculated the time  
348 response curve for [C] in dependence of varying the maximal value of  $k_1$ . This calculation  
349 mimics an almost instant and persistent level of DNA damage as seen following  $\gamma$ -irradiation.  
350 Low  $k_1$  values represent low DNA damage while large  $k_1$  values represent strong DNA damage.  
351 The result is a three-dimensional plot with time and  $k_1$  values as x and y axis and the level of  
352 [C] on the z axis. Fig. 6e shows a two-dimensional representation with contour lines for the  
353 value of [C]. Fig. 6f shows the same calculation only with  $k_3$  set to a higher level equal to the  
354 maximal value of  $k_1$ . Setting a [C]-value of 0.5 arbitrarily as the level that has to be reached to  
355 induce apoptosis demonstrates that this 'zone of death' is smaller for the calculations with the  
356 slow  $k_3$  value. Our simulation results suggest that the delayed phosphorylation of S591 sets  
357 the threshold for the DNA damage level that is necessary to induce apoptosis.

## 358 **DISCUSSION**

359 Cell division and cell death require yes/no answers without the possibility for an intermediate  
360 response. Consequently, cells have evolved molecular systems that translate ‘analog’ input  
361 signals into a ‘digital’ output signal. Many theoretical and experimental studies have shown  
362 different ways how cells build switch-like systems, often using multisite phosphorylation events  
363 as a signal integrator of the activity of two or more kinases. Although activation of TAp63 $\alpha$   
364 requires two different kinases, this integrator model does not seem to be the mode of  
365 activation, because CK1 kinases are thought to be constitutively active but sequentially  
366 dependent on a priming kinase such as CHK2. In this situation, activation of TAp63 $\alpha$  would  
367 only depend on the activation of CHK2. This model, however, is only valid if CK1 used a strictly  
368 processive mode of phosphorylation with all individual kinetic constants in the same range.  
369 Our results show, that both conditions are not true and that CK1 uses a distributive mode of  
370 phosphorylation in combination with very different kinetic constants to regulate TAp63 $\alpha$ 's  
371 activation. Importantly, it is the third phosphorylation event that is the slowest and that  
372 constitutes the decisive phosphorylation for the formation of the open, tetrameric state. The  
373 transition to the open tetrameric state is irreversible and all phosphate groups can be removed  
374 in this state without affecting its oligomerization status<sup>9</sup>. Phosphorylation of the third CK1 site,  
375 therefore, constitutes the ‘point of no return’. Mechanistically the slow kinetics seems to be the  
376 result of three effects. 1) S592 and E593 interact with a basic / polar cluster of the kinase and  
377 probably keep the peptide in the position as seen in the crystal structures. 2) Hydrophobic  
378 residues such as valine are preferred in the +1-position relative to the phosphorylation site due  
379 to the presence of a small hydrophobic patch next to the active site. Shifting S592 into this  
380 position would not allow a stable interaction. 3) The triple phosphorylated peptide (pS582,  
381 pS585, pS588) has a relatively high affinity to the kinase in a product type state. The crystal  
382 structure of the triple phosphorylated peptide with the phosphorylated S588 still pointing into  
383 the active site suggested product inhibition might play a role in slowing down phosphorylation  
384 of S591. This interpretation is supported by a study showing that temperature compensation  
385 of the circadian clock of which CK1 is a central component is at least partially based on a shift  
386 from high substrate affinity to higher product affinity of the kinase<sup>26</sup>, showing that product  
387 inhibition is an important aspect of regulation of CK1 activity.

388 Sequence alignments of the p63 PAD peptides revealed that not only the phosphorylation sites  
389 are highly conserved from fish to mammals<sup>13</sup> but also the valine-glycine sequence following  
390 the second CK1 site and the serine – glutamate sequence C-terminal to the third site,  
391 suggesting that activation of TAp63 $\alpha$  follows a universal, evolutionary conserved mechanism  
392 with similar activation kinetics in all these species.

393 An important question of multisite phosphorylation events is whether kinases use a processive  
394 or distributive mechanism. Examples exist for both types as well as a combination of both. Src

395 kinase and SRPK1 have been shown to modify up to fifteen tyrosine and eight serine residues  
396 in a processive manner, respectively<sup>27,28</sup> while the dual specificity kinase MEK uses a fully  
397 distributive mechanism<sup>23</sup>. One example for a combined mechanism is the yeast  
398 cyclin-dependent kinase Pho85 that modifies five residues in the transcription factor Pho4  
399 using both modes<sup>29</sup>. Our experiments have demonstrated that CK1 uses most likely a  
400 distributive mechanism of phosphorylation. The first two phosphorylation events are too fast to  
401 analyze in detail but more likely represent a distributive mechanism in combination with a fast  
402 rebinding. The third site, however, follows definitely a distributive and not a processive mode.  
403 Effectively, the first two CK1 phosphorylation sites act as a buffer that gets filled with a relatively  
404 fast kinetics. Only when these two sites are phosphorylated do the third (and fourth) sites  
405 become modified, resulting in a sigmoidal time response curve. Importantly, the general  
406 behavior of the individual phosphorylation events is not restricted to the relatively artificial  
407 phosphorylation of isolated peptides but can also be seen in the kinetic analysis of the same  
408 sequence within the full-length TAp63 $\alpha$  protein. Originally, we conducted these experiments  
409 with the full-length protein because we wanted to investigate potential steric hindrance effects.  
410 Surprisingly, phosphorylation of the third CK1 site is not slower, but faster within the full-length  
411 protein. This result might be a consequence of the dimeric state of TAp63 $\alpha$ , presenting two  
412 binding sites for CK1 per molecule (in addition to potentially many other non-specific interaction  
413 sites) that might keep the kinase in close proximity to TAp63 $\alpha$ , increasing the local  
414 concentration and in the end accelerating phosphorylation.

415 The model that we use to simulate the effect of the kinetic constants is of course simplified.  
416 Activated TAp63 $\alpha$  will initiate transcription of many other genes including p63 itself and  
417 probably E3 ligases which will influence the cellular concentration and localization. Despite  
418 these simplifications our results show that the difference in phosphorylation kinetics sets the  
419 threshold for p63 activation using a ‘doorbell like’ mechanism. This threshold level has been  
420 established during evolution to suppress oocyte loss due to random activation of TAp63 $\alpha$  or  
421 low levels of DNA damage caused for example by background radioactivity or normal levels of  
422 reactive oxygen species in oocytes. Our model predicts that mutations in the PAD sequence  
423 of TAp63 $\alpha$  can change this threshold level. A single nucleotide exchange within the codon of  
424 S592, AGT, to ATT would mutate this serine to an isoleucine, which would change the  
425 phosphorylation kinetics and, therefore, the threshold, leading to TAp63 $\alpha$  activation at lower  
426 damage levels. Two recent screens have shown, that mutations in TAp63 $\alpha$  can lead to POI. In  
427 both screens large rearrangements in the domain structure have created activated p63  
428 forms<sup>30,31</sup>. A S592I mutation would have much milder effects but could also contribute to a  
429 premature depletion of the primary oocyte reserve.

430 **ACKNOWLEDGMENTS**

431 The authors would like to thank Ina Theofel, Sarah Young and Eric Chih-Chao Liang for their  
432 review of and input into this manuscript. The research was funded by the DFG (DO 545/8-1),  
433 the Centre for Biomolecular Magnetic Resonance (BMRZ), and the Cluster of Excellence  
434 Frankfurt (Macromolecular Complexes). M.T. was supported by a Fellowship from the fund of  
435 the German Chemical Industry. L.S. and G.H. were supported by the Max Planck Society. F.P.,  
436 K.H. and E.H.K.S. thank the EU Horizon2020 project LSFM4LIFE (grant # 668350-2), the  
437 ZonMw-BMBF joint sponsored project 'The Onconoid Hub' (grant # 114027003) for funding.  
438 The Structural Genomics Consortium is a registered charity (number 1097737) that receives  
439 funds from the Canadian Institutes for Health Research, the Canadian Foundation for  
440 Innovation, Genome Canada through the Ontario Genomics Institute, GlaxoSmithKline,  
441 Karolinska Institute, the Knut and Alice Wallenberg Foundation, the Ontario Innovation Trust,  
442 the Ontario Ministry for Research and Innovation, Merck & Co., Inc., the Novartis Research  
443 Foundation, the Swedish Agency for Innovation Systems, the Swedish Foundation for  
444 Strategic Research, and the Wellcome Trust.

445

446 **AUTHOR CONTRIBUTIONS**

447 J.G. and M.T. performed NMR and kinetic assays *in vitro* and in ovaries. A.C. crystallized and  
448 solved the structures of the kinase-peptide complexes. K.H. and F.P. performed microscopy  
449 experiments and quantitative semi-automated segmentation, L.S. carried out MD simulations.  
450 F.L. performed NMR experiments, N.G. measured tetramerization kinetics, F.F., E.H. and J.M.  
451 expressed and purified proteins, M.S. measured phosphorylation kinetics, R.L. solved  
452 differential equations. M.T., G.H., E.H.K.S., S.K. and V.D. designed experiments and analyzed  
453 data. J.G., M.T., A.C. and V.D. wrote the manuscript.

454 **DECLARATION OF INTERESTS**

455 The authors declare no competing interests.

456

457 **MATERIALS & METHODS**

458 **Ovary Culture**

459 Animal care and handling were performed according to the guidelines set by the World Health  
460 Organization (Geneva, Switzerland). Eight-day-old (P8) female CD-1 mice were purchased  
461 from Charles River Laboratories. Ovaries were harvested, transferred to sterile 96-well plates  
462 with 50  $\mu$ l  $\alpha$ -MEM (+L-Glu, Gibco) supplemented with 10% FBS (Gibco), 1x penicillin/  
463 streptomycin (Gibco), 0.2 mg/ml Na-pyruvate (Gibco), 2 mg/ml *N*-acetyl-L-cysteine (Sigma) and  
464 ITS liquid media supplement (100x) (Sigma) cultured at 37°C with 5% CO<sub>2</sub> overnight<sup>32</sup>. The  
465 final concentrations of the kinase inhibitors targeting ATM (KU55399, Selleckchem), CHK2  
466 (BML-277, Merck) and CK1 (PF 670462, Sigma Aldrich) were 25  $\mu$ M. *Ex vivo* ovaries were  
467  $\gamma$ -irradiated with 0.50 Gy on a rotating turntable in a <sup>137</sup>Cs irradiator with a dose of  
468 2.387 Gy/min. The protocol for harvesting mouse ovaries was approved by the  
469 Tierschutzbeauftragte of the Goethe University Frankfurt/Main.

470

471 **Western blotting and blue native PAGE**

472 Western blotting and blue native PAGE (BN-PAGE) were performed as described  
473 previously<sup>13,33</sup>. The following antibodies were used for detection: anti-p63 $\alpha$  (D2K8K XP, Cell  
474 Signaling), anti-cleaved-PARP (D6X6X, Cell Signaling), anti-VASA (DDX-4) (ab13840,  
475 Abcam).

476

477 **Whole Ovary staining, optical clearing and light sheet-based fluorescence microscopy**  
478 **(LSFM)**

479 Cultured ovaries were treated as indicated and the staining was performed as described in  
480 Tuppi et al.<sup>13</sup>. In brief, the ovaries were harvested and fixed in 4% paraformaldehyde (PFA) in  
481 PBS overnight at 4°C. The ovaries were permeabilized using 0.3% Triton X-100 in PBS for 30  
482 minutes at room temperature. All further steps were performed in a 96-well flat bottom plate  
483 (Greiner) shaking at 450rpm. The ovaries were blocked for two hours using Blocking Buffer  
484 (0.3% Triton X-100, 0.05% Tween-20, 0.1% BSA (heat shock fraction, Sigma) and 10%  
485 Donkey Serum in PBS). Then the ovaries were incubated overnight at 37°C in a humidified  
486 incubator with the first antibody, an anti-Germ cell-specific antigen (GCNA1) (ab82527,  
487 Abcam), 1:200 and anti-cleaved PARP (D6X6X, Cell Signaling) and 1  $\mu$ g/ml DAPI, which was  
488 diluted in the Blocking Buffer. This was followed by three 20 minutes PBS washes and a  
489 subsequent four hours incubation of the secondary antibody, donkey anti-rabbit Alexa 488

490 (A-21206, Thermo Fisher) and donkey anti-rat Alexa 568 (ab1754775, Abcam), in a 1:200  
491 dilution in Blocking Buffer containing 1 µg/ml DAPI at 37°C in a humidified incubator in the  
492 dark. Protected from light, the ovaries were then washed three times for 20 minutes with PBS  
493 and kept at 4°C in PBS. The ovaries were cleared by washing them four times in CUBIC 2<sup>34</sup>  
494 (50% w/v Sucrose, 25% w/v Urea, 10% w/v 2,2',2''-nitrotriethanol) with a refraction index of  
495 1.49 and overnight incubation in CUBIC 2 inside a fluorinated ethylene propylene (FEP) foil  
496 capillary (Patent: US 20150211981 A1). The capillaries were mounted on stainless steel  
497 holders and images were acquired with a custom-built monolithic digital-scanned light sheet-  
498 based fluorescence microscope (mDSLIM)<sup>35</sup>. The microscope was equipped with an  
499 Epiplan-Neofluar 2.5x/0.06 illumination objective and a N-Achroplan 10x/0.3 detection  
500 objective (Carl Zeiss) and a Clara camera (ANDOR technology, Ireland). Z-spacing of 2.58  
501 µm. Laser and filter set: 488 nm laser, 525/50 bandpass filter. All raw image stacks were pre-  
502 processed in FIJI (ImageJ version 1.51d, Java version 1.6.0\_24). Specifically, the raw image  
503 stacks were cropped to the region of interest and scaled by a factor of two. To obtain a  
504 homogeneous intensity distribution in the individual images of the z-stacks, the stacks were  
505 resliced by a factor of four. The background intensity was subtracted using the FIJI function  
506 Subtract Background with a ball radius of 50 pixels and the contrast was enhanced applying  
507 the FIJI function Enhance Contrast (saturation=0.35). GCNA and c-PARP positive cells were  
508 segmented with the FIJI function 3D Object Counter. Objects with a size of min.=750 and  
509 max.=222218880 voxels and an intensity threshold of 1,000 were segmented. The total  
510 amount of c-PARP and GCNA positive cells per ovary were extracted and the ratio of  
511 GCNA/c-PARP per ovary was calculated. Three replicates per time point were analyzed.

512

### 513 **TAp63α expression, purification and phosphorylation**

514 Human TAp63α (aa10-616, TEV site inserted at aa570 and V599M) codon-optimized for  
515 expression in *E. coli* was subcloned into the pET16b vector. The protein, bearing a C-terminal  
516 His<sub>6</sub>-tag was expressed in BL-21(DE3)-R3-Rosetta (SGC Oxford) for 16 h at 18°C in M9  
517 minimal Media, containing 1 g/l <sup>15</sup>NH<sub>4</sub>Cl as nitrogen source. Additionally, the media was  
518 supplemented with 100 µM ZnCl<sub>2</sub> to ensure correct folding of the zinc finger containing DNA  
519 binding domain. Cells were lysed in IMAC buffer A (50 mM Tris pH 8.0, 400 mM NaCl, 20 mM  
520 β-mercaptoethanol, 5% glycerol, 10 µM ZnCl<sub>2</sub>) and purified using a standard step gradient  
521 (300 mM imidazol) immobilized metal affinity chromatography (IMAC) protocol (Ni-Sepharose  
522 Fast Flow, GE Healthcare). Afterwards, the protein was further purified by size exclusion  
523 chromatography (SEC) (HiLoad 16/600 Superdex 200 pg, GE Healthcare) in 50 mM Tris pH  
524 8.0, 150 mM NaCl, 5% glycerol, 0.5 mM TCEP. Purified TAp63α was incubated for 30 min at  
525 30°C with pre-activated MK2Δ1-41, 10 mM ATP and 10 mM MgCl<sub>2</sub>. Purification and activation  
526 of MK2Δ1-41 was performed as described previously<sup>13</sup>. Subsequently, TAp63α was separated



527 from MK2 by SEC (HiLoad 16/600 Superdex 200 pg, GE Healthcare). 2.5 mg of the  
528 pre-phosphorylated TAp63 $\alpha$  (pTAp63 $\alpha$ ) was then incubated with purified CK1 $\delta$  (molar ratio  
529 1:1000) with 10 mM ATP and 10 mM MgCl<sub>2</sub> at 25°C for the indicated time. Purification and  
530 activation of CK1 $\delta$  was performed as described previously<sup>13</sup>. To stop the reaction PF670462  
531 (10  $\mu$ M final concentration) and EDTA pH 8.0 (12 mM final concentration) were added.  
532 Afterwards, MBP-TEV were added in a 1:1 molar ratio and incubated overnight at 4°C. The  
533 cleavage was stopped by adding solid urea to it to a final concentration of 6 M. The denaturated  
534 mixture was concentrated and purified by SEC (Superdex 75, 10/300 GL, GE Healthcare) in  
535 50 mM Tris pH 8.0, 150 mM NaCl, 6 M Urea. The resulting PAD-TID peptide was acidified with  
536 32% HCl to a final concentration of 0.5 M and cleaved by a final concentration of 125 mM CNBr  
537 for 48 h at room temperature in the dark. The resulting product was concentrated for 30 min in  
538 a SpeedVac. Afterwards, MES pH 6.3 was added to a final concentration of 500 mM to adjust  
539 the pH. To remove the TID the reaction was purified by a reverse IMAC, concentrated and  
540 buffer exchanged (kinase NMR buffer, see below) by ultrafiltration (Amicon Ultra-0.5 ml, 3 kDa  
541 MWCO, Merck) for NMR analysis.

542

#### 543 **Peptide Expression**

544 Peptides were expressed with a protease cleavable N-terminal GFP-His<sub>6</sub>-tag. Isotopically  
545 labeled expression was performed in M9 for 16 h at 22°C under the induction with 500  $\mu$ M  
546 IPTG. Initial purification was done analogous to full-length TAp63 $\alpha$ . After IMAC purification, the  
547 expression tag and the peptide were split by incubation with 3C protease overnight at 4°C. On  
548 the next day the peptide and GFP were subject to concentration via ultrafiltration (Amicon Ultra  
549 10 kDa MWCO, Merck) and removal of the GFP and 3C protease. The flow through of the filter  
550 was subject to another round of concentration over a 3 kDa cutoff filter. Afterwards the peptides  
551 were subject to SEC in kinase NMR buffer, see below (Superdex 75 10/300 GL, GE  
552 Healthcare).

553

#### 554 **Peptide MK2 pre-phosphorylation**

555 Peptides were S582 -phosphorylated with MK2 kinase at 25°C at a molar ratio of 1:100 kinase  
556 to peptide and an ATP concentration of 10 mM. Phosphorylation was monitored by recording  
557 a series of 2D NMR spectra. MK2 was subsequently removed from the reaction mix by another  
558 round of SEC (Superdex 75, 10/300 GL, GE Healthcare).

559

#### 560 **NMR Spectroscopy**

561 Samples for NMR experiments employed kinase buffer (50 mM Bis-Tris pH 6.5, 50 mM NaCl,  
562 10 mM MgCl<sub>2</sub>). Additionally, all samples contained 1x protease inhibitor cocktail (cComplete  
563 EDTA free, Roche) and 1x phosphatase inhibitor cocktail (PhosSTOP, Roche). Experiments

564 were performed at a sample temperature of 298 K. Assignments of PAD mutants at different  
565 phosphorylation states were performed using a combinatorial triple-selective labeling  
566 approach, as detailed in<sup>36</sup> or with the help of a constant-time HNCACB.

567 Phosphorylation kinetics were recorded using sample volumes of 200  $\mu$ l placed in 3-mm  
568 capillaries and final peptide concentrations of 250  $\mu$ M. The general sample composition of a  
569 kinetic sample was as follows:

|                                 |                |
|---------------------------------|----------------|
| <sup>15</sup> N-labeled peptide | to 250 $\mu$ M |
| protease inhibitor              | 1x             |
| phosphatase inhibitor           | 1x             |
| ATP                             | to 10 mM       |
| CK1 kinase (3 $\mu$ M stock)    | 8.3 $\mu$ l    |
| buffer                          | to 200 $\mu$ l |

570 A series of HSQC-like [<sup>15</sup>N, <sup>1</sup>H] correlation spectra were recorded throughout the kinetic  
571 reaction with NMR instruments operating at <sup>1</sup>H frequencies ranging from 600 to 950 MHz. To  
572 accurately reflect the extremely fast initial phosphorylation reactions of S582 and S585 the  
573 total measurement time of each spectrum was limited to a maximum of 120 s. This was  
574 achieved by using a gradient-selected BEST-TROSY pulse sequence<sup>37</sup> and either by limiting  
575 the measurement to one scan per FID or by reducing the interscan delay to 100 ms, depending  
576 on the field strength the sample was measured at. Non-uniform sampling was not employed  
577 as the large quantity of ATP within the sample leads to non-recoverable t1-noise like artefacts,  
578 overlaying the signals.

579 Prior to addition of kinase a reference spectrum was acquired. Kinase was added manually,  
580 and a series of spectra were recorded over the time course of ~12 h. Peak intensities of  
581 relevant peaks were quantified for every spectrum automatically. The fraction of  
582 phosphorylation in a given amino acid was calculated by dividing the relevant peak  
583 intensity/intensities by the sum of all peak intensities of a given amino acid.

584 YAP1 phosphorylation kinetics were measured based on <sup>13</sup>C detected 2D (H)NCO  
585 experiments to resolve peak overlap in the [<sup>15</sup>N, <sup>1</sup>H]-HSQC spectrum. Two-dimensional <sup>13</sup>C  
586 detected N-CO correlation spectra were obtained using a BEST-(H)NCO pulse sequence  
587 essentially as described by Gil et al.<sup>38</sup>. Nitrogen chemical shifts were acquired in a  
588 semi-constant time manner using States-TPPI quadrature detection. Homonuclear <sup>13</sup>CO-<sup>13</sup>C $\alpha$   
589 decoupling was achieved by the IPAP approach<sup>39</sup>. To allow for very short interscan delays  
590 without causing sample - and RF coil heating <sup>15</sup>N decoupling during acquisition was not applied  
591 in the current implementation. Acquisition was immediately started after the 9.4-ms IPAP delay  
592 (= (2<sup>1</sup>J<sub>C $\alpha$ CO</sub>)<sup>-1</sup>), leading to a slightly shorter pulse sequence duration. Refocusing of the active  
593 <sup>1</sup>J<sub>CON</sub> coupling takes place during the fixed <sup>13</sup>CO-<sup>13</sup>C $\alpha$  IPAP delay and proceeds during  
594 acquisition. As a consequence, line shapes along the directly detected <sup>13</sup>CO dimension are a  
595 superposition of non-resolved in-phase <sup>1</sup>J<sub>CON</sub> doublets, phased to absorption, and dispersive  
596 antiphase <sup>1</sup>J<sub>CON</sub> doublets. It should be noted that higher resolution in the carbonyl dimension

597 could be obtained using virtual  $^{13}\text{C}$ - $^{15}\text{N}$  decoupling as originally proposed<sup>38</sup>, but this would  
598 entail doubling the experimental time because twice the number of FIDs would have to be  
599 recorded for each time domain data point. Spectra were recorded on a Bruker AVIII 800 MHz  
600 spectrometer equipped with a cryogenic  $^1\text{H}/^{13}\text{C}/^{15}\text{N}$  triple resonance TXO probe optimized for  
601  $^{13}\text{C}$  detection. Acquisition times were 60 ms for  $^{13}\text{C}$  and 98.7 ms for  $^{15}\text{N}$  with spectral widths of  
602 20 ppm in both dimensions. Four FIDs were acquired for each time domain data point in the  
603 indirect dimension (two for  $^{15}\text{N}$  quadrature detection and two for  $^{13}\text{C}$ - $^{13}\text{C}\alpha$  IPAP) and two  
604 scans were accumulated for each FID. Using a relaxation delay of 0.1 s and non-uniform  
605 sampling (37.5 % sparse) the total experimental time for each spectrum was 2 min.  
606 Phosphorylated Ser/Thr residues were identified on the basis of  $^3J_{\text{C}\alpha\text{P}}$  couplings using a  
607  $^{31}\text{P}$ -edited intra-HNCA experiment as previously proposed<sup>40</sup>. To enable a direct comparison  
608 with the N-CO correlation spectra acquired to monitor the phosphorylation reaction, a carbonyl  
609 evolution time ( $t_1$ ) was introduced here, resulting in the 3D [ $^{15}\text{N}$ ,  $^1\text{H}$ ]-BEST-TROSY-  
610 COintraHN(CAP) pulse sequence shown in Supplementary Fig. 3b. The projection along the  
611  $^1\text{H}$  dimension of the final 3D spectrum provides the desired  $^{15}\text{N}_i$ - $^{13}\text{C}\text{O}_{i-1}$  cross peaks of  
612 phosphorylated residues  $i$ . The spectrum was acquired with a cryogenic  $^1\text{H}/^{31}\text{P}/^{13}\text{C}/^{15}\text{N}$   
613 quadruple resonance QCI probe on a Bruker AVIIIHD 700 MHz spectrometer. Spectral widths  
614 were adjusted to 8, 10 and 9.6 ppm, respectively, along the  $^{13}\text{C}$ ,  $^{15}\text{N}$ , and  $^1\text{H}$  dimensions, where  
615 the  $^1\text{H}$  carrier was placed on the water frequency. Acquisition times were 53.8 ms ( $^{13}\text{C}$ , 76  
616 complex points), 115.5 ms ( $^{15}\text{N}$ , 82 complex points), and 76.1 ms ( $^1\text{H}$ , 512 complex points).  
617 Non-uniform sampling was employed to record a total of 2181 hypercomplex points (35% of  
618 the full  $t_1/t_2$  grid). The spectrum was acquired within 24 h using a recycle delay of 0.25 s and  
619 16 scans/FID.

620

## 621 NMR kinetic analysis

622 The phosphorylation kinetics was analyzed according to a sequential model:

623 [A]  $\rightarrow$  [B]  $\rightarrow$  [C]  $\rightarrow$  [D] with [A] representing the CHK2-phosphorylated PAD peptide and [B], [C]  
624 and [D] representing successive phosphorylated species. The functions for fitting the  
625 experimental data were:

$$626 \quad [A] = [A]_0 e^{-k_1 t}$$

$$627 \quad [B] = \frac{k_1 [A]_0}{k_2 - k_1} [e^{-k_1 t} - e^{-k_2 t}]$$

$$628 \quad [C] = k_1 k_2 [A]_0 \left[ \frac{1}{(k_2 - k_1)(k_3 - k_1)} e^{-k_1 t} - \frac{1}{(k_2 - k_1)(k_3 - k_2)} e^{-k_2 t} \right. \\ 629 \quad \left. + \frac{1}{(k_3 - k_2)(k_3 - k_1)} e^{-k_3 t} \right]$$

$$630 \quad [D] = \frac{k_2 k_3 [A]_0}{(k_2 - k_1)(k_3 - k_1)} [1 - e^{-k_1 t}] - \frac{k_1 k_3 [A]_0}{(k_2 - k_1)(k_3 - k_2)} [1 - e^{-k_2 t}] - \frac{k_1 k_2 [A]_0}{(k_3 - k_1)(k_3 - k_2)} [1 - e^{-k_3 t}]$$

631 Fitting and visualization were performed with the software package Prism 6.0 (GraphPad).

632

### 633 **Crystal structure determination**

634 The kinase domain of CK1 $\delta$  (aa. 1-294) was subcloned into pNIC28-Bsa4, and the  
635 recombinant protein containing an N-terminal His<sub>6</sub> tag was expressed in *E. coli*, cultured in TB  
636 and induced with 0.5 mM IPTG at 18°C overnight. Cells were harvested and lysed by  
637 sonication, and the protein was purified by IMAC. The histidine tag was cleaved by TEV  
638 protease treatment, and the cleaved protein was purified further by reverse IMAC and SEC.  
639 The pure protein in 20 mM Tris, pH 7.5, 200 mM NaCl and 0.5 mM TCEP was concentrated to  
640 6-8 mg/ml, and was mixed with either ADP or AMPPCP (Sigma) at 2 mM and MgCl<sub>2</sub> at 4 mM.  
641 Crystallization was performed using sitting drop vapor diffusion method at 4°C using the  
642 condition containing 10-20% PEG 3350, 0.1-0.2 M sodium sulfate and 0.1 M citrate, pH 4.6-  
643 5.9. Viable crystals were soaked with the PAD peptides at 6-10 mM overnight in the mother  
644 liquor containing 20% ethylene glycol before flash-cooled in liquid nitrogen. Diffraction data  
645 were collected at Swiss Light Source, X06SA or DESY, P13, and were processed and scaled  
646 with XDS<sup>41</sup> and subsequently scaled using aimless<sup>42</sup>, respectively. The CK1 $\delta$  structures in  
647 complexes with the peptides were solved by molecular replacement using Phaser<sup>43</sup> and the  
648 published coordinates of CK1 $\delta$ <sup>44</sup>. Manual model rebuilding alternated with structure  
649 refinement was performed in COOT<sup>45</sup> and REFMAC<sup>46</sup>, respectively. Geometry correctness of  
650 the final structures were checked using Molprobit<sup>47</sup>. Data collection and refinement statistics  
651 are summarized in Supplementary Table 2.

652 Peptides used for crystallization in complex with CK1 $\delta$ :

653 PAD-1P = YTP(pS)SASTVSVGSSET (MW = 1639.6, e = 1490)

654 PAD-2P = YTP(pS)SA(pS)TVSVGSSET (MW = 1719.6, e = 1490)

655 PAD-3P = (pS)SA(pS)TV(pS)VGSSY (MW 1371.16, e=1490)

656

### 657 **Mathematical model**

658 The system of differential equations describing the model in Fig. 6 was solved numerically  
659 using the Runge-Kutta method implemented in the software package SageMath 8.7. The script  
660 used is shown below.

661

662 For Fig. 6 b-d the following script was used:

```
663 w,x,y,z,t=var('w x y z t')
```

```
664 a=1/(1+(30/(t+0.000001))^4) # k1
```

```
665 b=0.008 # k2
```

```
666 c=1/40 # k3
667 d=0.008 # k4
668 P=desolve_system_rk4([-a*w+b*x,a*w-(b+c)*x,c*x-d*y,d*y],[w,x,y,z],ics=[0,1,0,0,0],
669 ivar=t,end_points=720,step=1)
670 Q1=[ [i,j] for i,j,k,l,m in P]
671 Q2=[ [i,k] for i,j,k,l,m in P]
672 Q3=[ [i,l] for i,j,k,l,m in P]
673 print table(columns=[Q1,Q2,Q3])
674
```

675 For Fig. 6 e,f the following script was used:

```
676 w,x,y,z,t=var('w x y z t')
677 o = 0
678 v = 0
679 while o <= 1000:
680 v=(1000^(o/1000)-1)/999
681 a=(1/(1+(30/(t+0.000001))^4))*v # k1
682 b=0.008 # k2
683 c=1/40 # k3
684 d=0.008 # k4
685 P=desolve_system_rk4([-a*w+b*x,a*w-(b+c)*x,c*x-d*y,d*y],[w,x,y,z],ics=[0,1,0,0,0],
686 ivar=t,end_points=720,step=1)
687 Q3=[ [o,i,l] for i,j,k,l,m in P]
688 print Q3
689 o = o + 1
690
```

691 The different functions for k<sub>1</sub> were as follows:

692 sigmoidal curve with initial delay:  $a=1/(1+(30/(t+0.000001))^4)$

693 constant k<sub>1</sub>:  $a=1$

694 hyperbolic k<sub>1</sub>:  $a=(\exp(1)-\exp(1/t))/(\exp(1)-1)$

695 Gaussian curve k<sub>1</sub>:  $a=\exp(-((t-40)/20)^2)$

696

697 Curves were plotted using the software package Prism 6.0 (GraphPad). Two-dimensional plots  
698 were created with Gnuplot (<http://www.gnuplot.info/>).

699

## 700 **ADP-Glo**

701  $k_M$ ,  $V_{max}$  and  $k_{cat}$  values for given kinase substrates were determined using the ADP-Glo Kit  
702 system (Promega). In all cases reactions were carried out in 384 well plates at room

703 temperature for 30 min with a total kinase concentration of 50 nM and 1 mM ultra-pure ATP.  
704 To limit the concentration error due to the extremely low assay volume (5  $\mu$ l) peptide dilution  
705 series as well as ATP and CK1 $\delta$  addition were performed by an Echo 550 (Labcyte) ultrasonic  
706 liquid handler. Phosphorescence was detected with a Spark plate reader (Tecan).

707

### 708 **Molecular Dynamics Simulations**

709 Initial simulation models were built according to the X-ray crystal structure p63-PAD-3P, with  
710 bound ADP replaced by ATP. All crystallographic water molecules and ions within 10 Å of the  
711 protein were retained. ATP and a complexed Mg<sup>2+</sup> ion were added using the Protein Data Bank  
712 entry 1CSN as template, by superimposing the protein backbones and aligning the nitrogen  
713 atoms of ATP with the crystallographic ADP. Missing side chains were added using the  
714 software Modeller<sup>48</sup>. The triple phosphorylated peptide PAD-3P was elongated to  
715 TPpSSApSTVpSVGSSSETRGER with charged termini as used in the kinetic measurements by  
716 means of VMD Molefracture<sup>49</sup> and Modeller (S592 and E593 coordinates from p63-PAD-2P).  
717 Using these tools, we also constructed a complex of CK1 with a shortened peptide  
718 ACE-TPpSSApSTVpSVGSSSETRG-NME capped with N-terminal acetyl and C- terminal  
719 methylamino capping groups. This peptide mimics the full-length protein, because E597 and  
720 R598 may not be accessible to CK1. In a third setup, the point mutation V589A was introduced  
721 into the longer peptide using Modeller. In all three setups, Asp128 was protonated. All other  
722 residues were simulated in their physiological protonation state. All three MD simulations were  
723 carried out with Gromacs 2018<sup>50</sup> using the AMBER99SB\*-ILDN-q force field<sup>51-54</sup>, the water  
724 model TIP3P<sup>55</sup> and the Schwierz ion force field<sup>56</sup> for Mg<sup>2+</sup> and NaCl at 150 mM concentration.  
725 Force field parameters for ATP and phosphoserine were taken from Meagher et al.<sup>57</sup> and  
726 Homeyer et al.<sup>58</sup>, respectively. The system was energy minimized followed by five equilibration  
727 steps with successively decreasing position restraints on heavy atoms, first in an NVT  
728 ensemble (0.25 ns) and then in an NPT ensemble (4 x 0.5 ns) using a Berendsen thermostat  
729 and barostat<sup>59</sup>. The three production runs of 1  $\mu$ s each were run at a temperature of 310 K in  
730 an NPT ensemble using a Nosé-Hoover thermostat<sup>60</sup>. The pressure was maintained at 1 bar  
731 with a Parrinello-Rahman barostat<sup>61</sup>. The minimum heavy-atom distances between E593 and  
732 Arg127, between E593 and Lys154, as well as the minimum heavy-atom distance between  
733 V589 or A589 (sidechain) and the protein CK1 were monitored at 1 ns intervals using the gmx  
734 mindist tool. The raw distance data were processed using Moving Average Smoothing with a  
735 window size of 5. All structural figures were made using VMD<sup>49</sup>.

### 736 **Data accessibility**

737 All data are fully available upon request.

738 **References**

- 739 1. Richardson, S.J., Senikas, V. & Nelson, J.F. Follicular depletion during the  
740 menopausal transition: evidence for accelerated loss and ultimate exhaustion. *J Clin*  
741 *Endocrinol Metab* **65**, 1231-7 (1987).
- 742 2. Johnston, R.J. & Wallace, W.H. Normal ovarian function and assessment of ovarian  
743 reserve in the survivor of childhood cancer. *Pediatr Blood Cancer* **53**, 296-302 (2009).
- 744 3. Maltaris, T., Beckmann, M.W. & Dittrich, R. Review. Fertility preservation for young  
745 female cancer patients. *In Vivo* **23**, 123-30 (2009).
- 746 4. Suh, E.K. et al. p63 protects the female germ line during meiotic arrest. *Nature* **444**,  
747 624-8 (2006).
- 748 5. Wallace, W.H., Thomson, A.B. & Kelsey, T.W. The radiosensitivity of the human  
749 oocyte. *Hum Reprod* **18**, 117-21 (2003).
- 750 6. Quast, U. Whole body radiotherapy: A TBI-guideline. *J Med Phys* **31**, 5-12 (2006).
- 751 7. Woodard, T.L. & Bolcun-Filas, E. Prolonging Reproductive Life after Cancer: The  
752 Need for Fertoprotective Therapies. *Trends Cancer* **2**, 222-233 (2016).
- 753 8. Livera, G. et al. p63 null mutation protects mouse oocytes from radio-induced  
754 apoptosis. *Reproduction* **135**, 3-12 (2008).
- 755 9. Deutsch, G.B. et al. DNA damage in oocytes induces a switch of the quality control  
756 factor TAp63alpha from dimer to tetramer. *Cell* **144**, 566-76 (2011).
- 757 10. Kerr, J.B. et al. DNA damage-induced primordial follicle oocyte apoptosis and loss of  
758 fertility require TAp63-mediated induction of Puma and Noxa. *Mol Cell* **48**, 343-52  
759 (2012).
- 760 11. Kim, S.Y. et al. Transient inhibition of p53 homologs protects ovarian function from  
761 two distinct apoptotic pathways triggered by anticancer therapies. *Cell Death Differ*  
762 **26**, 502-515 (2019).
- 763 12. Bolcun-Filas, E., Rinaldi, V.D., White, M.E. & Schimenti, J.C. Reversal of female  
764 infertility by Chk2 ablation reveals the oocyte DNA damage checkpoint pathway.  
765 *Science* **343**, 533-6 (2014).
- 766 13. Tuppi, M. et al. Oocyte DNA damage quality control requires consecutive interplay of  
767 CHK2 and CK1 to activate p63. *Nat Struct Mol Biol* **25**, 261-269 (2018).
- 768 14. Coutandin, D. et al. Quality control in oocytes by p63 is based on a spring-loaded  
769 activation mechanism on the molecular and cellular level. *Elife* **5**(2016).
- 770 15. Prehoda, K.E., Scott, J.A., Mullins, R.D. & Lim, W.A. Integration of multiple signals  
771 through cooperative regulation of the N-WASP-Arp2/3 complex. *Science* **290**, 801-6  
772 (2000).
- 773 16. Chen, L., Glover, J.N., Hogan, P.G., Rao, A. & Harrison, S.C. Structure of the DNA-  
774 binding domains from NFAT, Fos and Jun bound specifically to DNA. *Nature* **392**,  
775 42-8 (1998).
- 776 17. Schitteck, B. & Sinnberg, T. Biological functions of casein kinase 1 isoforms and  
777 putative roles in tumorigenesis. *Mol Cancer* **13**, 231 (2014).
- 778 18. Rinaldi, V.D., Hsieh, K., Munroe, R., Bolcun-Filas, E.M. & Schimenti, J.C.  
779 Pharmacological Inhibition of the DNA Damage Checkpoint Prevents Radiation-  
780 Induced Oocyte Death. *Genetics* (2017).
- 781 19. Carmell, M.A. et al. A widely employed germ cell marker is an ancient disordered  
782 protein with reproductive functions in diverse eukaryotes. *Elife* **5**(2016).
- 783 20. Ferrell, J.E., Jr. & Ha, S.H. Ultrasensitivity part III: cascades, bistable switches, and  
784 oscillators. *Trends Biochem Sci* **39**, 612-8 (2014).
- 785 21. Ferrell, J.E., Jr. & Ha, S.H. Ultrasensitivity part II: multisite phosphorylation,  
786 stoichiometric inhibitors, and positive feedback. *Trends Biochem Sci* **39**, 556-69  
787 (2014).

- 788 22. Ferrell, J.E., Jr. & Ha, S.H. Ultrasensitivity part I: Michaelian responses and zero-  
789 order ultrasensitivity. *Trends Biochem Sci* **39**, 496-503 (2014).
- 790 23. Ferrell, J.E., Jr. & Bhatt, R.R. Mechanistic studies of the dual phosphorylation of  
791 mitogen-activated protein kinase. *J Biol Chem* **272**, 19008-16 (1997).
- 792 24. Serber, Z. et al. A C-terminal inhibitory domain controls the activity of p63 by an  
793 intramolecular mechanism. *Mol Cell Biol* **22**, 8601-11 (2002).
- 794 25. Zhao, B., Li, L., Tumaneng, K., Wang, C.Y. & Guan, K.L. A coordinated  
795 phosphorylation by Lats and CK1 regulates YAP stability through SCF(beta-TRCP).  
796 *Genes Dev* **24**, 72-85 (2010).
- 797 26. Shinohara, Y. et al. Temperature-Sensitive Substrate and Product Binding Underlie  
798 Temperature-Compensated Phosphorylation in the Clock. *Mol Cell* **67**, 783-798 e20  
799 (2017).
- 800 27. Patwardhan, P., Shen, Y., Goldberg, G.S. & Miller, W.T. Individual Cas  
801 phosphorylation sites are dispensable for processive phosphorylation by Src and  
802 anchorage-independent cell growth. *J Biol Chem* **281**, 20689-97 (2006).
- 803 28. Velazquez-Dones, A. et al. Mass spectrometric and kinetic analysis of ASF/SF2  
804 phosphorylation by SRPK1 and Clk/Sty. *J Biol Chem* **280**, 41761-8 (2005).
- 805 29. Jeffery, D.A., Springer, M., King, D.S. & O'Shea, E.K. Multi-site phosphorylation of  
806 Pho4 by the cyclin-CDK Pho80-Pho85 is semi-processive with site preference. *J Mol*  
807 *Biol* **306**, 997-1010 (2001).
- 808 30. Tucker, E.J. et al. TP63-truncating variants cause isolated premature ovarian  
809 insufficiency. *Hum Mutat* (2019).
- 810 31. Bestetti, I. et al. High-resolution array-CGH analysis on 46,XX patients affected by  
811 early onset primary ovarian insufficiency discloses new genes involved in ovarian  
812 function. *Hum Reprod* **34**, 574-583 (2019).
- 813 32. Rossi, V. et al. LH prevents cisplatin-induced apoptosis in oocytes and preserves  
814 female fertility in mouse. *Cell Death Differ* **24**, 72-82 (2017).
- 815 33. Straub, W.E. et al. The C-terminus of p63 contains multiple regulatory elements with  
816 different functions. *Cell Death Dis* **1**, e5 (2010).
- 817 34. Susaki, E.A. et al. Whole-brain imaging with single-cell resolution using chemical  
818 cocktails and computational analysis. *Cell* **157**, 726-39 (2014).
- 819 35. Keller, P.J., Schmidt, A.D., Wittbrodt, J. & Stelzer, E.H. Digital scanned laser light-  
820 sheet fluorescence microscopy (DSLIM) of zebrafish and *Drosophila* embryonic  
821 development. *Cold Spring Harb Protoc* **2011**, 1235-43 (2011).
- 822 36. Lohr, F., Gebel, J., Henrich, E., Hein, C. & Dotsch, V. Towards complete polypeptide  
823 backbone NH assignment via combinatorial labeling. *J Magn Reson* **302**, 50-63  
824 (2019).
- 825 37. Favier, A. & Brutscher, B. Recovering lost magnetization: polarization enhancement  
826 in biomolecular NMR. *J Biomol NMR* **49**, 9-15 (2011).
- 827 38. Gil, S. et al. NMR spectroscopic studies of intrinsically disordered proteins at near-  
828 physiological conditions. *Angew Chem Int Ed Engl* **52**, 11808-12 (2013).
- 829 39. Bermel, W. et al. Complete assignment of heteronuclear protein resonances by  
830 protonless NMR spectroscopy. *Angewandte Chemie-International Edition* **44**, 3089-  
831 3092 (2005).
- 832 40. McIntosh, L.P. et al. Detection and assignment of phosphoserine and  
833 phosphothreonine residues by (13)C- (31)P spin-echo difference NMR spectroscopy. *J*  
834 *Biomol NMR* **43**, 31-7 (2009).
- 835 41. Kabsch, W. Xds. *Acta Crystallogr D Biol Crystallogr* **66**, 125-32 (2010).
- 836 42. Evans, P.R. & Murshudov, G.N. How good are my data and what is the resolution?  
837 *Acta Crystallographica Section D-Biological Crystallography* **69**, 1204-1214 (2013).



- 838 43. McCoy, A.J. Acknowledging Errors: Advanced Molecular Replacement with Phaser.  
839 *Methods Mol Biol* **1607**, 421-453 (2017).
- 840 44. Long, A.M., Zhao, H. & Huang, X. Structural basis for the potent and selective  
841 inhibition of casein kinase 1 epsilon. *J Med Chem* **55**, 10307-11 (2012).
- 842 45. Emsley, P. Tools for ligand validation in Coot. *Acta Crystallogr D Struct Biol* **73**, 203-  
843 210 (2017).
- 844 46. Skubak, P., Murshudov, G.N. & Pannu, N.S. Direct incorporation of experimental  
845 phase information in model refinement. *Acta Crystallogr D Biol Crystallogr* **60**, 2196-  
846 201 (2004).
- 847 47. Williams, C.J. et al. MolProbity: More and better reference data for improved all-atom  
848 structure validation. *Protein Sci* **27**, 293-315 (2018).
- 849 48. Sali, A. & Blundell, T.L. Comparative protein modelling by satisfaction of spatial  
850 restraints. *J Mol Biol* **234**, 779-815 (1993).
- 851 49. Humphrey, W., Dalke, A. & Schulten, K. VMD: visual molecular dynamics. *J Mol*  
852 *Graph* **14**, 33-8, 27-8 (1996).
- 853 50. Bekker, H. et al. Gromacs - a Parallel Computer for Molecular-Dynamics Simulations.  
854 *Physics Computing '92*, 252-256 (1993).
- 855 51. Best, R.B. & Hummer, G. Optimized molecular dynamics force fields applied to the  
856 helix-coil transition of polypeptides. *J Phys Chem B* **113**, 9004-15 (2009).
- 857 52. Hornak, V. et al. Comparison of multiple Amber force fields and development of  
858 improved protein backbone parameters. *Proteins* **65**, 712-25 (2006).
- 859 53. Lindorff-Larsen, K. et al. Improved side-chain torsion potentials for the Amber  
860 ff99SB protein force field. *Proteins-Structure Function and Bioinformatics* **78**, 1950-  
861 1958 (2010).
- 862 54. Best, R.B., de Sancho, D. & Mittal, J. Residue-Specific alpha-Helix Propensities from  
863 Molecular Simulation. *Biophysical Journal* **102**, 1462-1467 (2012).
- 864 55. Jorgensen, W.L., Chandrasekhar, J., Madura, J.D., Impey, R.W. & Klein, M.L.  
865 Comparison of Simple Potential Functions for Simulating Liquid Water. *Journal of*  
866 *Chemical Physics* **79**, 926-935 (1983).
- 867 56. Mamatkulov, S. & Schwierz, N. Force fields for monovalent and divalent metal  
868 cations in TIP3P water based on thermodynamic and kinetic properties. *J Chem Phys*  
869 **148**, 074504 (2018).
- 870 57. Meagher, K.L., Redman, L.T. & Carlson, H.A. Development of polyphosphate  
871 parameters for use with the AMBER force field. *Journal of Computational Chemistry*  
872 **24**, 1016-1025 (2003).
- 873 58. Homeyer, N., Horn, A.H.C., Lanig, H. & Sticht, H. AMBER force-field parameters  
874 for phosphorylated amino acids in different protonation states: phosphoserine,  
875 phosphothreonine, phosphotyrosine, and phosphohistidine. *Journal of Molecular*  
876 *Modeling* **12**, 281-289 (2006).
- 877 59. Berendsen, H.J.C., Postma, J.P.M., Vangunsteren, W.F., Dinola, A. & Haak, J.R.  
878 Molecular-Dynamics with Coupling to an External Bath. *Journal of Chemical Physics*  
879 **81**, 3684-3690 (1984).
- 880 60. Hoover, W.G. Canonical Dynamics - Equilibrium Phase-Space Distributions. *Physical*  
881 *Review A* **31**, 1695-1697 (1985).
- 882 61. Parrinello, M. & Rahman, A. Polymorphic Transitions in Single-Crystals - a New  
883 Molecular-Dynamics Method. *Journal of Applied Physics* **52**, 7182-7190 (1981).

884

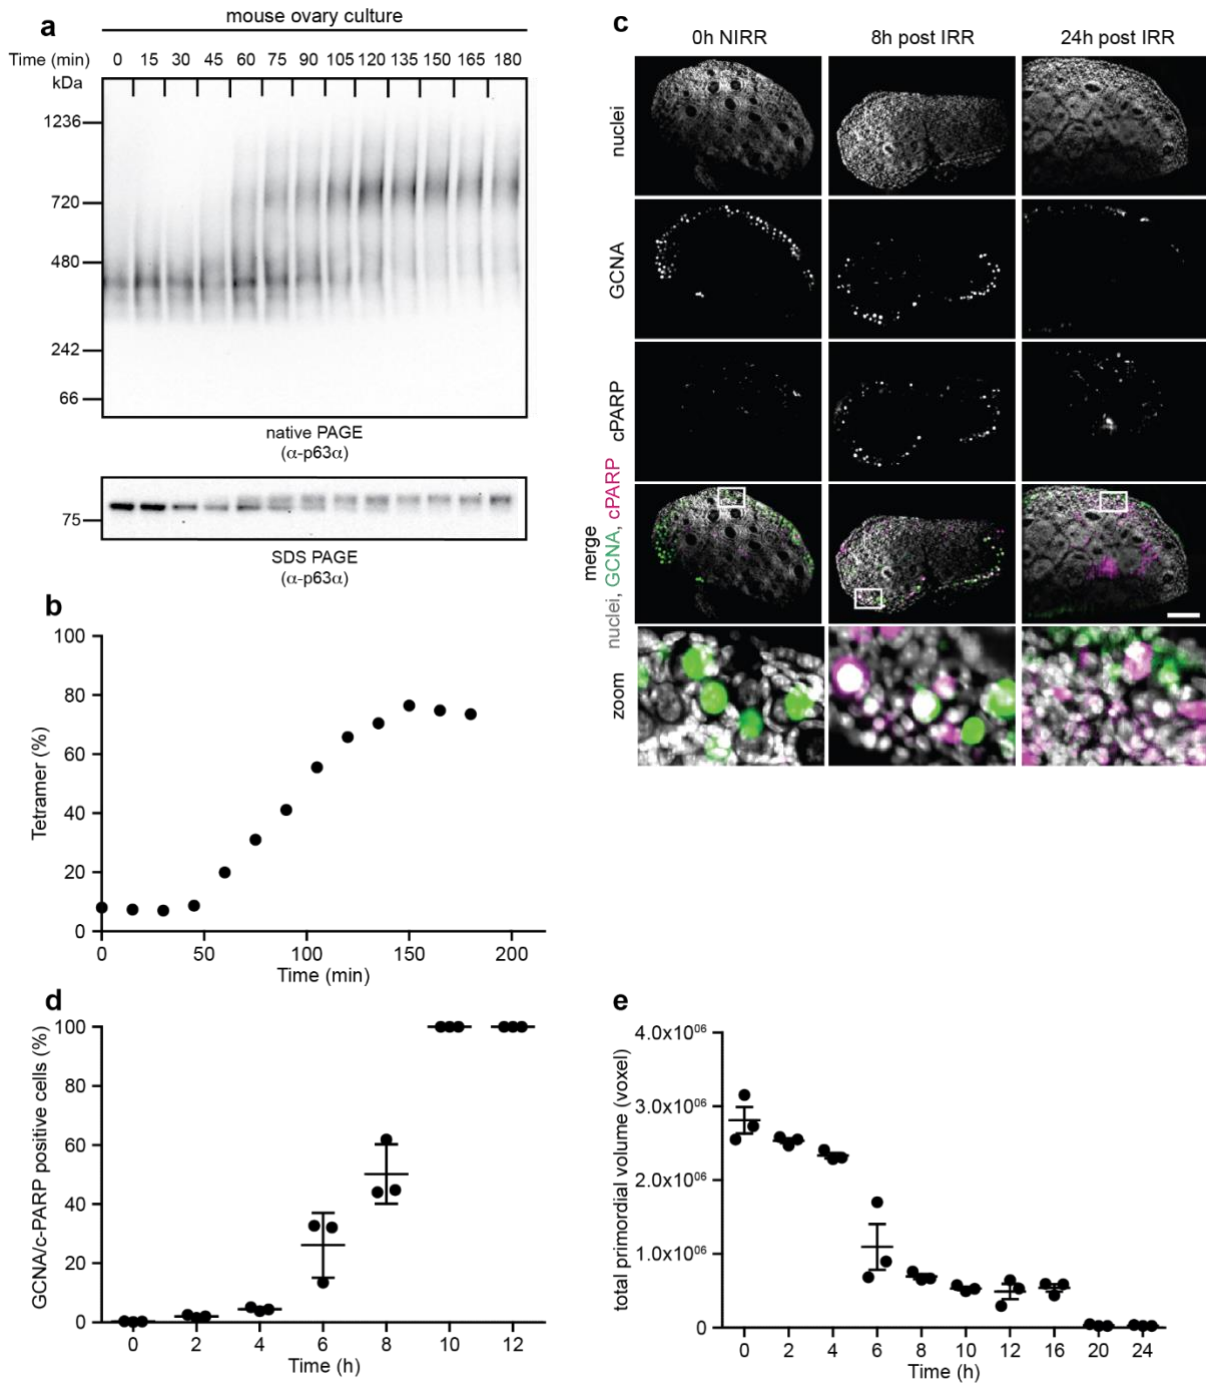

885  
886

**Fig. 1 TAp63 $\alpha$  mediated primordial follicle death follows an overall sigmoidal kinetics**

887 **a**, Whole mouse ovaries were *ex vivo*  $\gamma$ -irradiated with 0.5 Gy or left untreated. The oligomeric  
888 state was analyzed as a function of time by BN-PAGE and the phosphorylation dependent  
889 mobility shift by SDS-PAGE. **b**, Densitometric analysis of the dimeric and tetrameric fraction of  
890 **a**. **c**, Representative single plane images of whole mount 3D ovary stainings using DAPI  
891 (nuclei), GCNA and cleaved PARP (c-PARP) at the indicated time points after the 0.5 Gy  
892  $\gamma$ -irradiation (IRR) and of untreated ovaries. **d**, Ratio of c-PARP positive GCNA positive cells  
893 of whole ovaries after 0.5 Gy  $\gamma$ -irradiation using whole mount 3D ovary staining. **e**, Time  
894 dependent GCNA positive cells, quantified in voxels, after 0.5 Gy  $\gamma$ -irradiation using whole

895 mount 3D ovary staining. **d** and **e**, data presented as mean  $\pm$  SD ( $n = 3$ ). See also  
896 Supplementary Fig. 1.

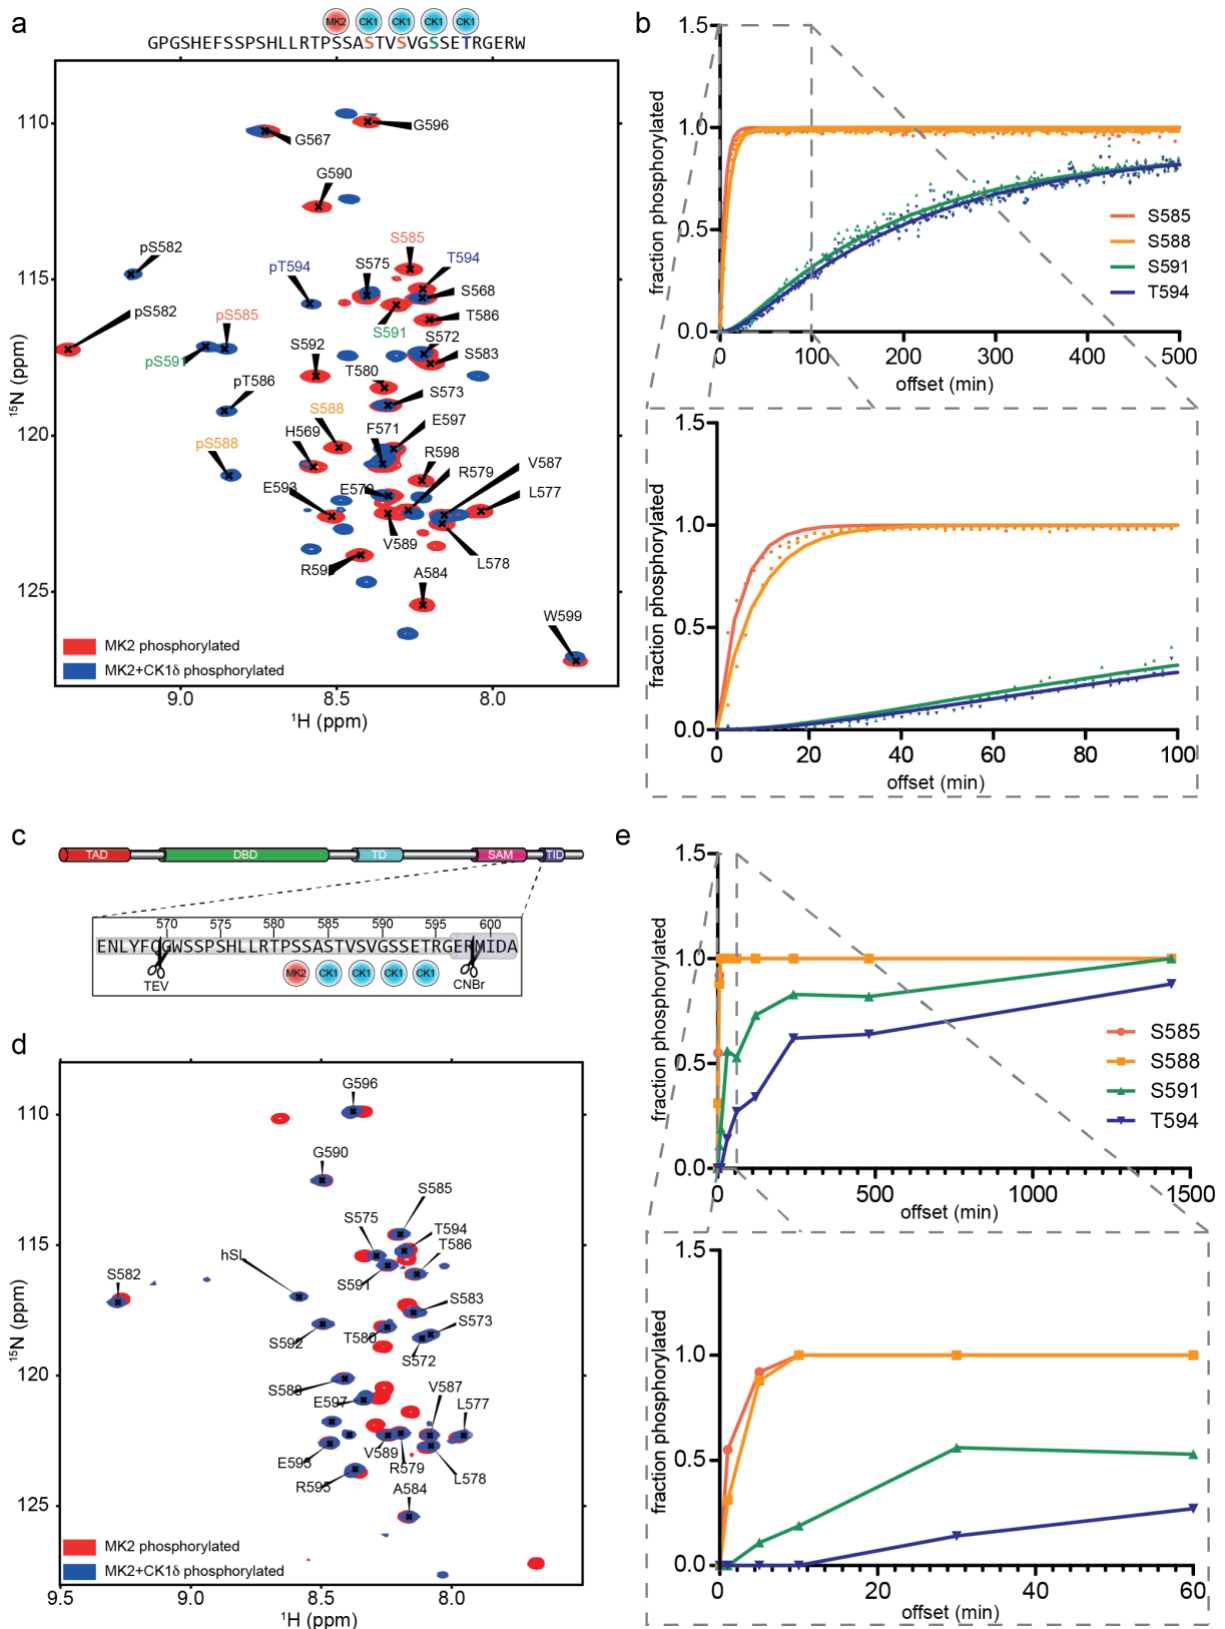

897  
898 **Fig. 2 The third CK1 phosphorylation is the slowest step in the TAP63α phosphorylation**  
899 **and constitutes the ‘point of no return’**

900 **a**, Single site phosphorylation kinetics was measured by NMR spectroscopy. Overlay of the  
901 [<sup>15</sup>N, <sup>1</sup>H]-HSQC spectra of MK2 pre-phosphorylated (red) and CK1 phosphorylated (blue)  
902 spectra of the PAD peptide representing the starting and the end point. The analyzed peptide

903 sequence is shown above the spectra. **b**, Quantitative evaluation of the phosphorylation  
904 kinetics of the four CK1 sites. Zoomed graph at the bottom focuses on the initial reaction  
905 showing that the third and fourth sites get modified only after the first two sites are almost  
906 100% phosphorylated. **c**, Schematic representation of the domain structure of TAp63 $\alpha$   
907 showing the location of the PAD peptide and the sites used for cleaving the peptide by TEV  
908 protease and CNBr. **d**, Overlay of [ $^{15}\text{N}$ ,  $^1\text{H}$ ]-HSQC spectra of MK2 pre-phosphorylated (red)  
909 and CK1 phosphorylated (blue) PAD peptide cleaved from full-length TAp63 $\alpha$ . **e**, Quantitative  
910 evaluation of the phosphorylation kinetics of the four CK1 sites in full-length TAp63 $\alpha$ . See also  
911 Supplementary Fig. 2 and Supplementary Table 1.

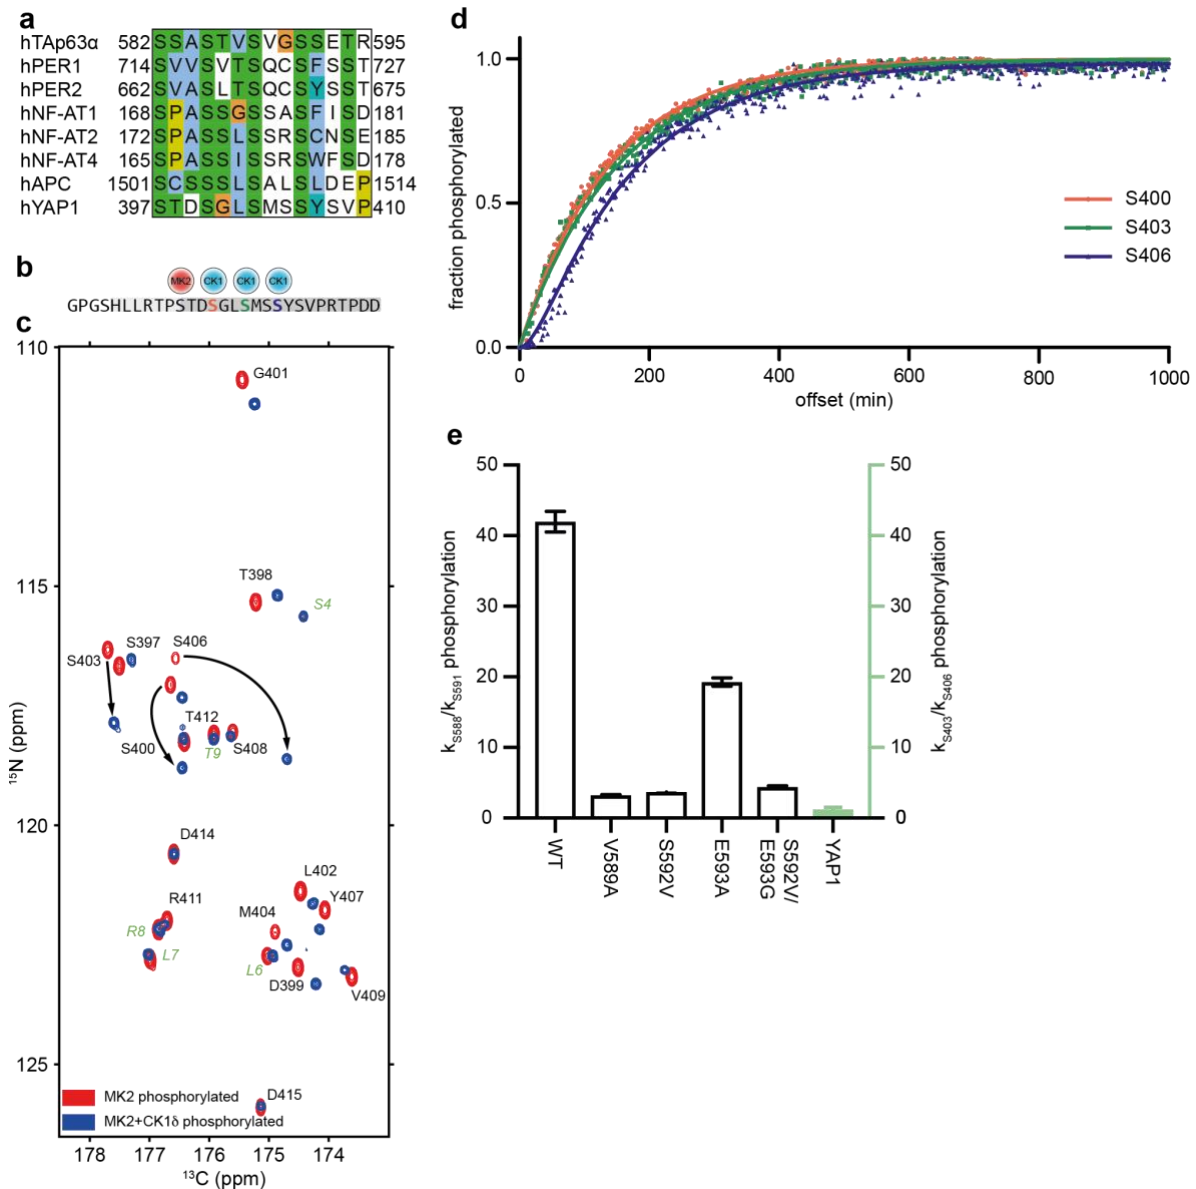

912

913

**Fig. 3 Kinetics of YAP1 phosphorylation by CK1 is not biphasic**

914

**a**, Comparison of sequences taken from the indicated proteins that harbor multiple CK1

915

phosphorylation sites. Sequences refer to hTAp63α: NM\_003722.4 (numbering according to

916

AF\_075430.1), hPER1: NM-002616.2, hPER2: NM\_022817.2, hNF-AT1: NM\_173091.3,

917

hNF-AT2: NM\_001278669.1, hNF-AT4: NM\_173165.2, hAPC: NM\_000038.6 and hYAP1:

918

NM\_001130145.2. **b**, Sequence of the YAP1 peptide highlighting the site of pre-

919

phosphorylation (red) and the three CK1 sites (blue). **c**, Overlay of 2D  $^{13}\text{C}$ -detected (H)NCO

920

spectra of MK2 pre-phosphorylated (red) and CK1 phosphorylated (blue) YAP1 peptide.

921

Arrows show representative examples of signals shifted due to phosphorylation. Amino acids

922

not belonging to the YAP1 sequence are indicated in green. **d**, Quantitative evaluation of the

923

kinetics of the three CK1 sites demonstrating that the three phosphorylation sites show a very

924

similar kinetics. **e**, Bar diagram describing the difference in rate constants of S588 and S591

925

phosphorylation in wild type p63 and mutants as well as YAP1 (green bar, right side). The error

926 represents the standard deviation of the fitting procedure. See also Supplementary Fig. 3 and  
927 Supplementary Table 1.

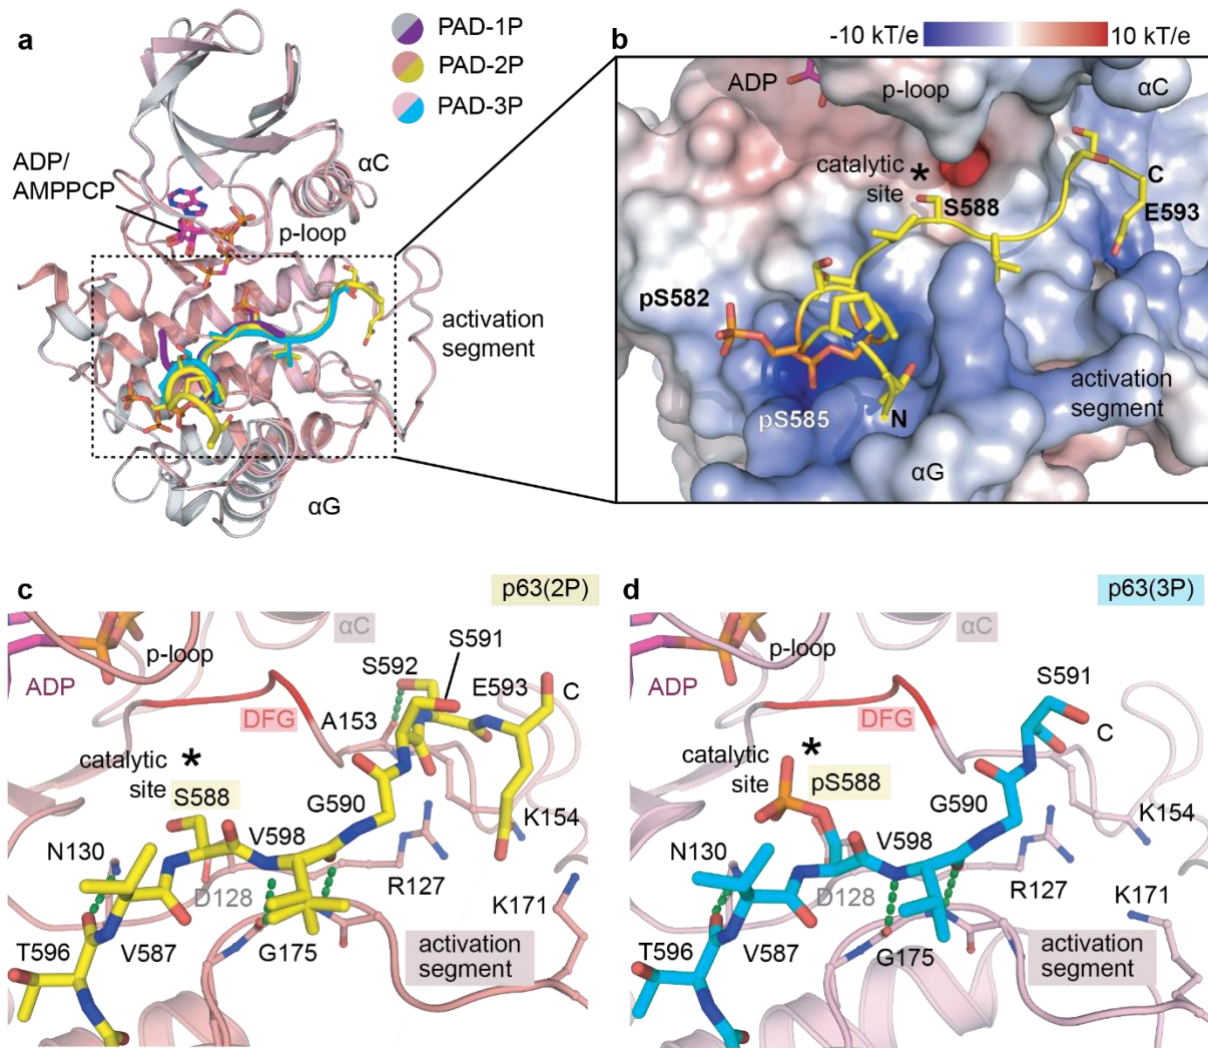

928

929

**Fig. 4 Crystal structures of CK1δ in complexes with different PAD peptides.**

930

**a**, Superimposition of all complexed structures demonstrates similar binding conformation of

931

the PAD peptides within the kinase. Three PAD peptides colored differently as indicated harbor

932

different phosphorylation states, including PAD-1P containing single phosphorylated S582,

933

PAD-2P with double phosphorylations on S582 and S585, and PAD-3P with triple

934

phosphorylations on S582, S588 and S588. **b**, Electrostatic potential on the kinase surface at

935

the substrate peptide binding sites reveals both charge and shape complementarity for an

936

accommodation of the PAD-2P peptide. **c-d**, Detailed interactions between the PAD-2P or

937

PAD-3P and the kinase are highly resembled despite representing different states of substrate-

938

and product-bound complexes, respectively. See also Supplementary Fig. 4 and

939

Supplementary Table 2.



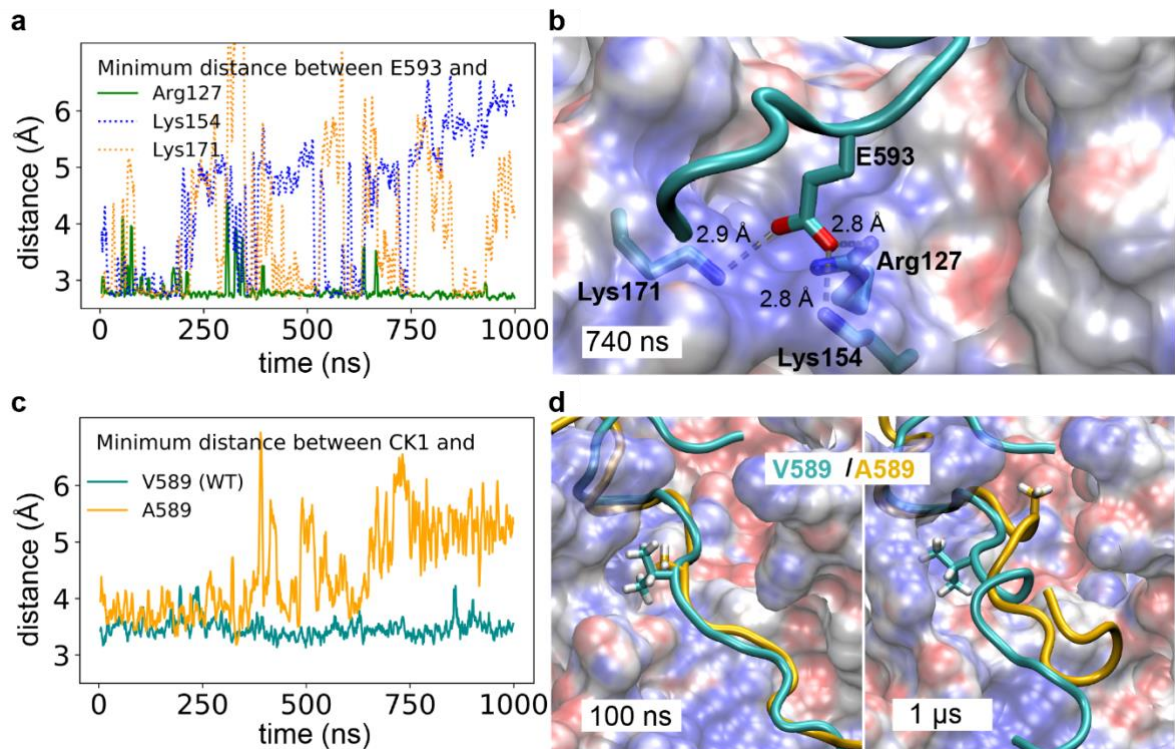

940

941 **Fig. 5 MD Simulations indicate that E593 and V589 of the p63 peptide are important for**  
942 **interaction with CK1**

943 **a**, E593 is pinned down by salt bridges with CK1. Minimum heavy-atom distances of E593(p63)  
944 to Arg127(CK1) and Lys154(CK1) as function of time. E593 forms a salt bridge with Lys154  
945 (distance < 3 Å), and binds transiently to Lys154. **b**, Representative snapshot at 740ns,  
946 zooming in on the C-terminal region of the p63 peptide. CK1 is shown as transparent  
947 electrostatic surface (blue/red for positive/negative charge) and the p63 peptide is represented  
948 as cyan cartoon. The residues E593, Arg127 and Lys154 are highlighted. The minimum  
949 distances between E593 and the basic residues are indicated. **c**, Mutation of V589 to A589  
950 enhances the flexibility of the p63 peptide. Minimum heavy-atom distances of CK1 to V589  
951 and A589 in WT and mutant p63 peptides as function of time. V589 remains adhered to the  
952 CK1 protein surface, whereas A589 gets solvated and moves away from the CK1 protein  
953 surface. **d**, Snapshots at 100 ns and 1 μs, zooming in on the C-terminal region of the p63  
954 peptide. CK1 structures were superimposed. CK1 from the wild type simulation is represented  
955 as in **b** and the p63 peptide is shown in cartoon representation (cyan: WT; yellow: V589A) with  
956 V589 and A589 highlighted. Shown are results for the longer p63 construct. See  
957 Supplementary Fig. 5 for the capped and shortened p63 construct.

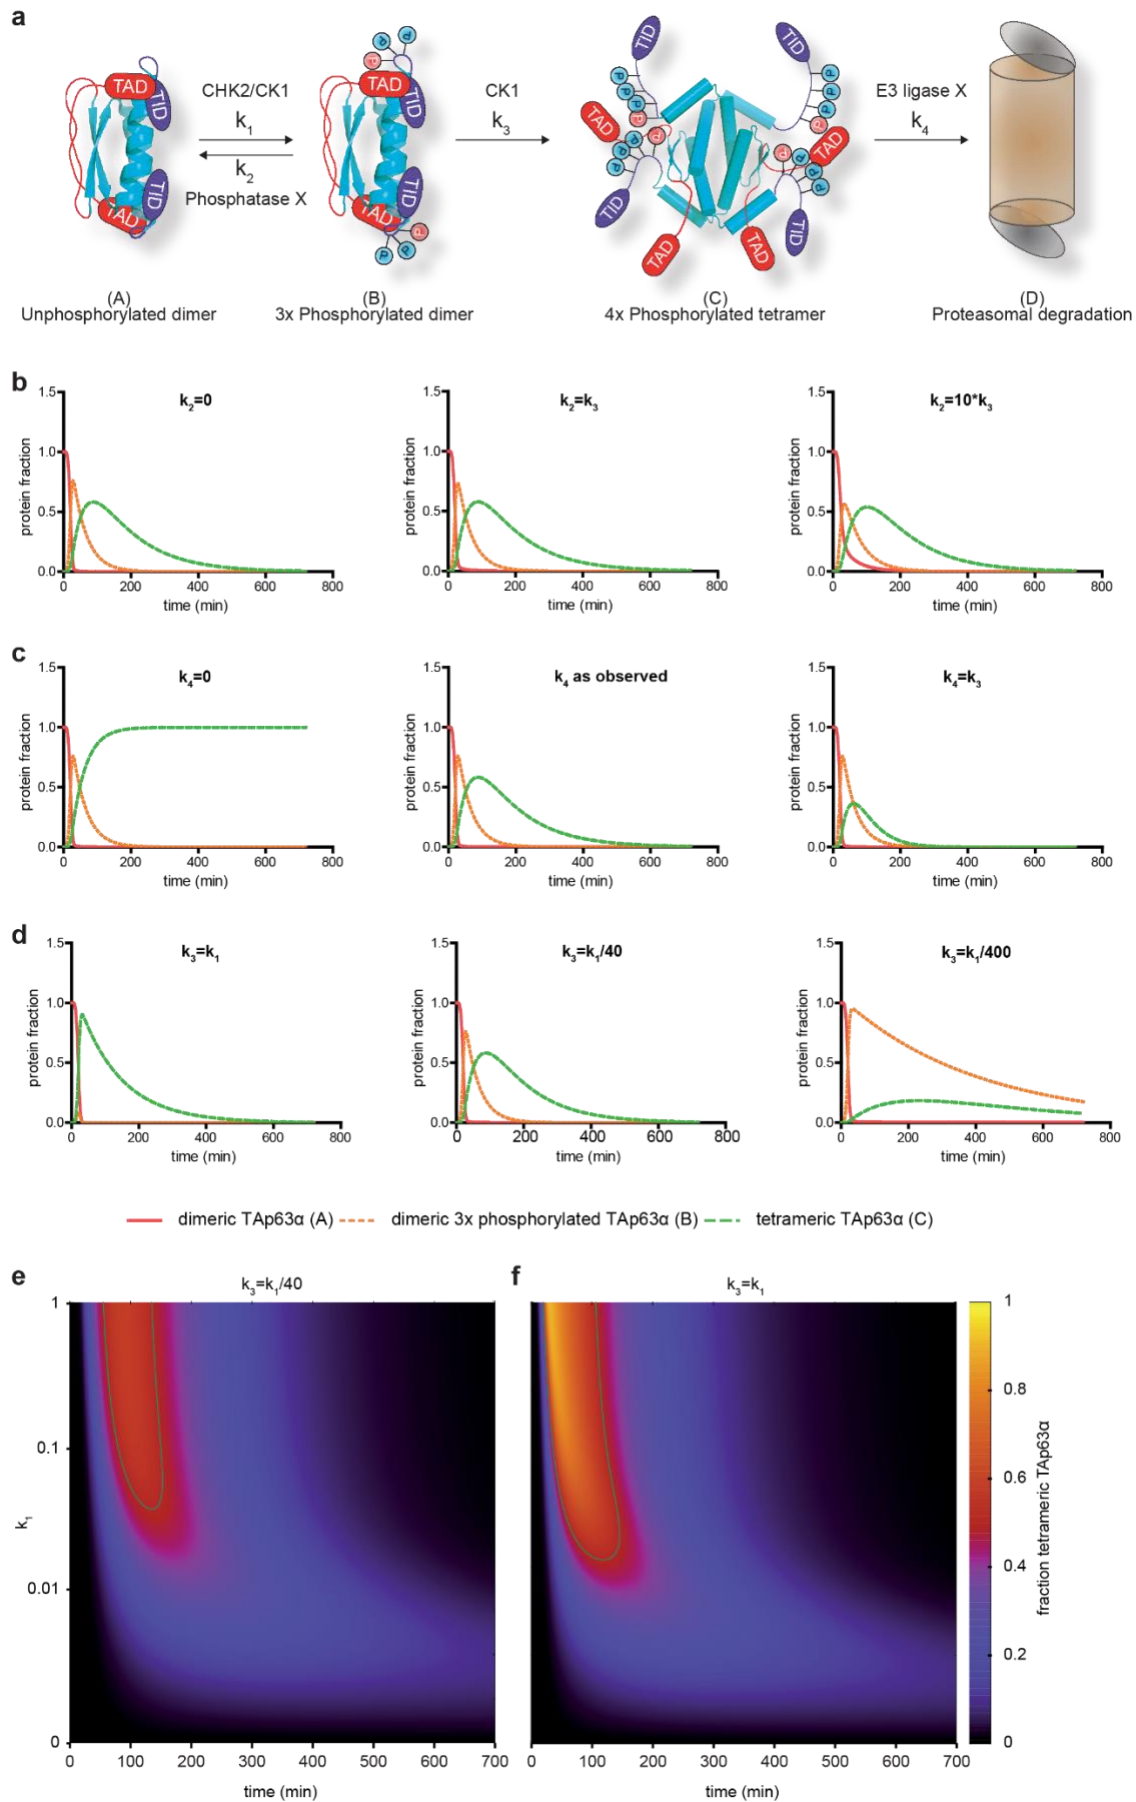

958  
959  
960

**Fig. 6 Simulation of the effect of different kinetic constants on the concentration of tetrameric active TAp63 $\alpha$  [C]**

961 **a**, Model of the phosphorylation dependent activation of TAp63 $\alpha$ . Phosphorylation by CHK2  
962 and the first 2 CK1 sites are combined into one kinetic constant  $k_1$ . Dephosphorylation and  
963 degradation are described by  $k_2$  and  $k_4$ , respectively. The decisive third phosphorylation by  
964 CK1 is represented by kinetic constant  $k_3$ . **b**, Curves representing the concentration of non-  
965 phosphorylated, dimeric TAp63 $\alpha$  [A] (red), triple phosphorylated, dimeric TAp63 $\alpha$  [B] (yellow)  
966 and quadruple phosphorylated, tetrameric TAp63 $\alpha$  [C] (green) were calculated according to  
967 the model in **a** for three different values of  $k_2$ , indicated above each diagram. **c**, same as in **b**  
968 but varying the value of  $k_4$ . **d**, same as in **b** and **c** with variation of  $k_3$ . **e**, Two-dimensional plot  
969 of time (x-axis) vs  $k_1$  (y-axis). Variations of  $k_1$  are shown on a logarithmic scale. The  
970 concentration of [C] is represented on the z-axis with different colors according to the values  
971 shown at the right. The green line represents the contour level of a [C]-value of 0.5 which was  
972 set arbitrarily as the level of activation that would induce apoptosis ('zone of death'). **f**, Same  
973 as in **e** but with a 40-times faster  $k_3$  level showing that the 'zone of death' is larger. See also  
974 Supplementary Fig. 6.

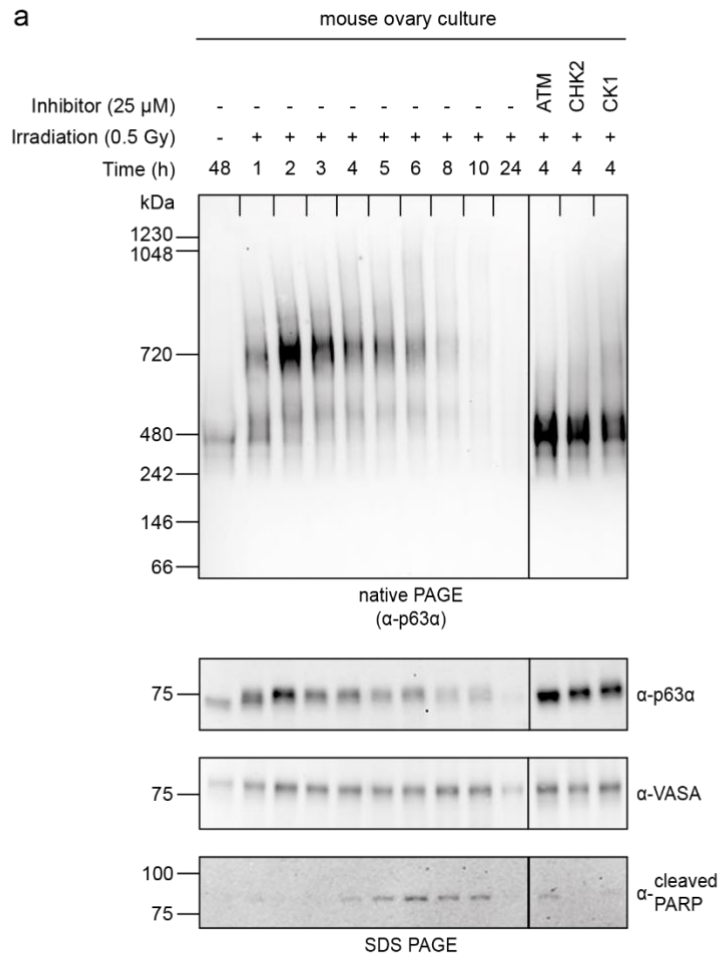

**b**

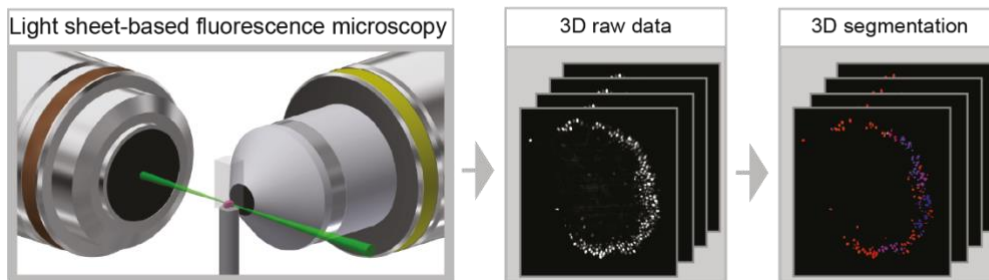

975

976 **Supplementary Fig. 1**

977 **a**, Whole mouse ovaries were *ex vivo*  $\gamma$ -irradiated with 0.5 Gy with or without indicated kinase  
978 inhibitors or left untreated. The oligomeric state was analyzed as a function of time by  
979 BN-PAGE and the phosphorylation dependent mobility shift was analyzed by SDS-PAGE.  
980 Apoptosis was monitored by detecting cleaved PARP and primordial oocytes level were  
981 detected using  $\alpha$ -VASA antibody. **b**, Workflow of our developed light sheet-based whole mount  
982 3D ovary staining. Ovaries were stained and imaged using FEP foil holders and light sheet-  
983 based fluorescence microscopy. The raw data were segmented and semi-automatically  
984 processed resulting in a quantitatively analyzed evaluation in whole ovaries.

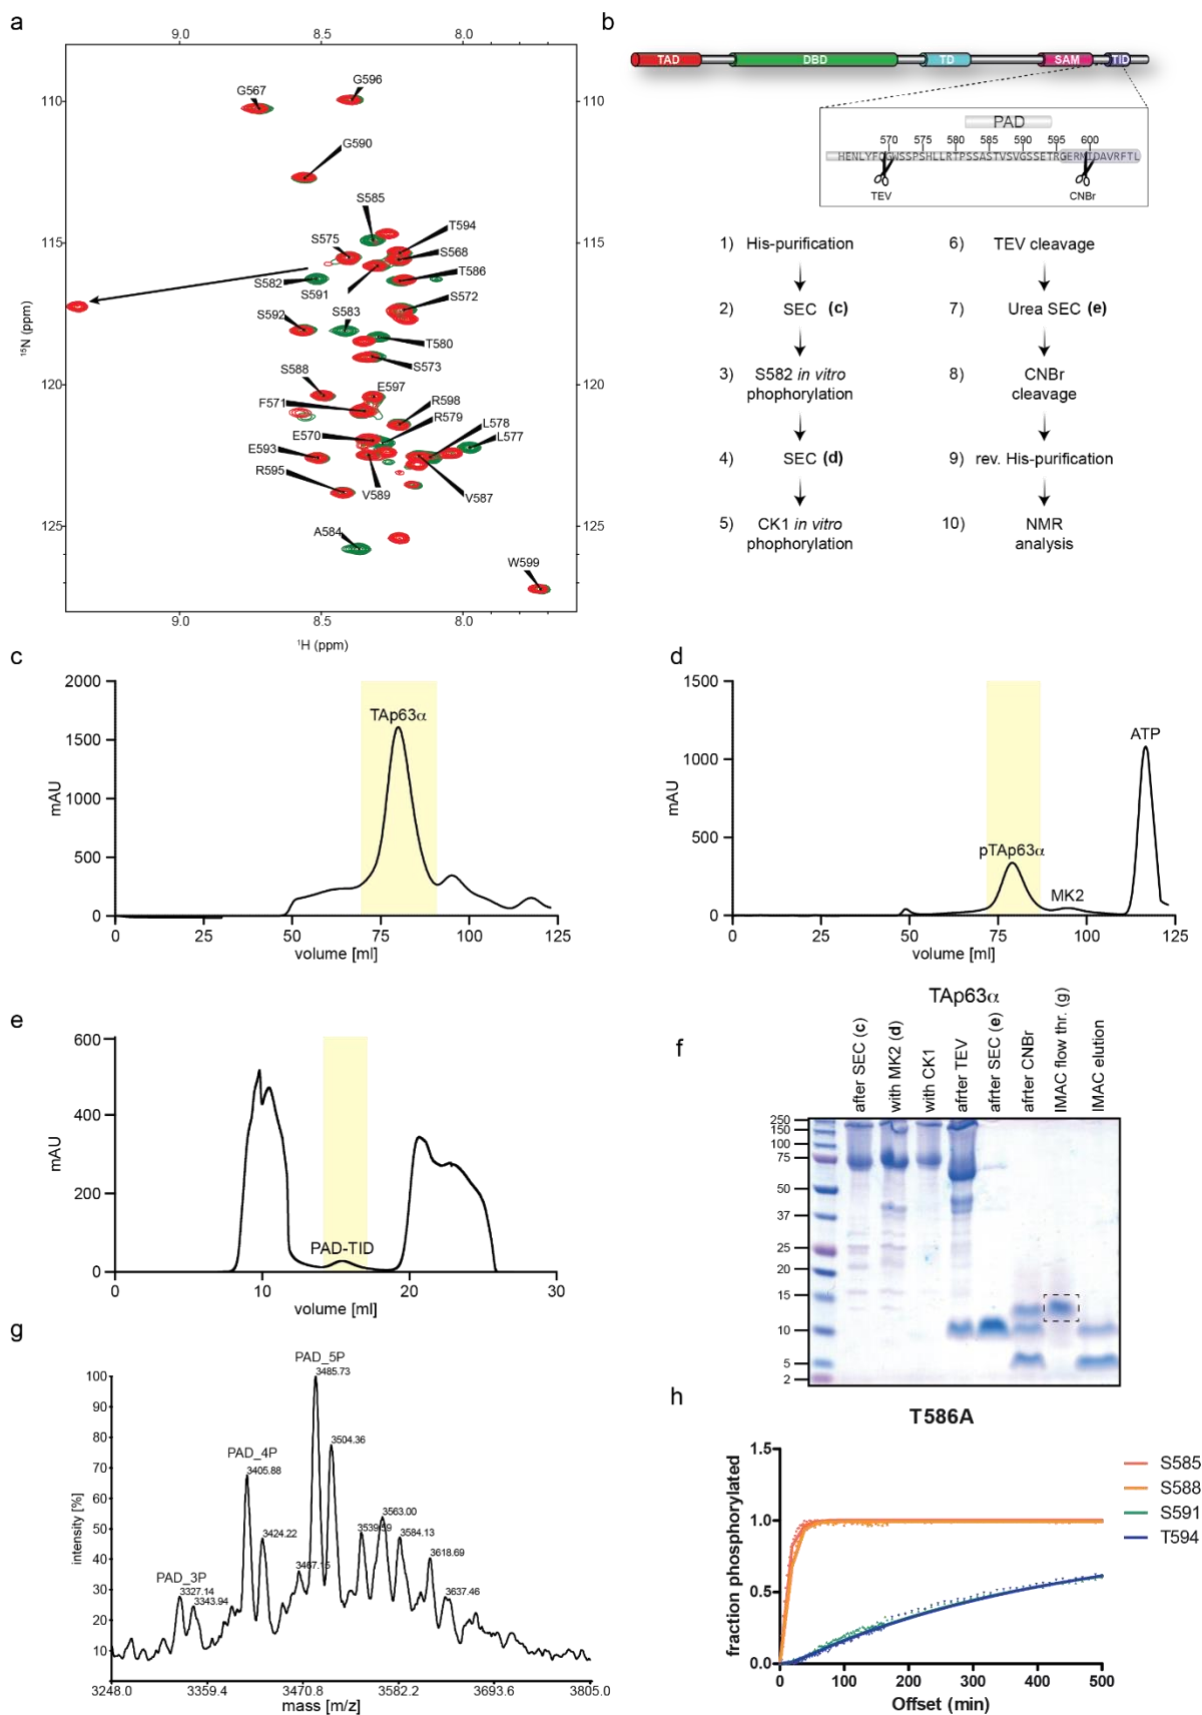

985

986 **Supplementary Fig. 2**

987 **a**, Overlay of HSQS spectra of unphosphorylated (green) and MK2 phosphorylated PAD  
988 peptide (red). A large chemical shift change in S582 can be observed as the result of

989 phosphorylation. **b-d**, General purification strategy of phosphorylated PAD peptides from full  
990 length TAp63 $\alpha$ . The protein was expressed in *E. coli* and initially purified via IMAC, followed  
991 by SEC (Superdex 200 16/600) (**c**). Dimeric fractions (highlighted yellow) were collected and  
992 subject to MK2 phosphorylation. This was followed by another round of SEC (Superdex 200  
993 16/600) to remove MK2 kinase (**d**). **e**, Denaturing SEC (Superdex 75 10/300 GL) of cleaved  
994 TAp63 $\alpha$ . The PAD-TID peptide is marked in yellow. **f**, SDS-page summarizing the purification  
995 of the PAD peptide from full-length protein. The dashed box corresponds to the peptide  
996 analyzed by mass spectrometry in **g**. **g**, ESI spectrum of the PAD peptide isolated from  
997 TAp63 $\alpha$ . Several different phosphorylation states of the peptide can be observed. Generally,  
998 a set of two peaks, with a mass difference of 18 Da, can be observed for each phosphorylation  
999 state. This most likely is the result of partial hydrolysis of the homoserine-lactone created by  
1000 CNBr cleavage of the PAD-TID sequence. **h**, T586A mutant of the PAD peptide, showing the  
1001 same distinct difference between S588 and S591 phosphorylation kinetics as the wild type  
1002 sequence.

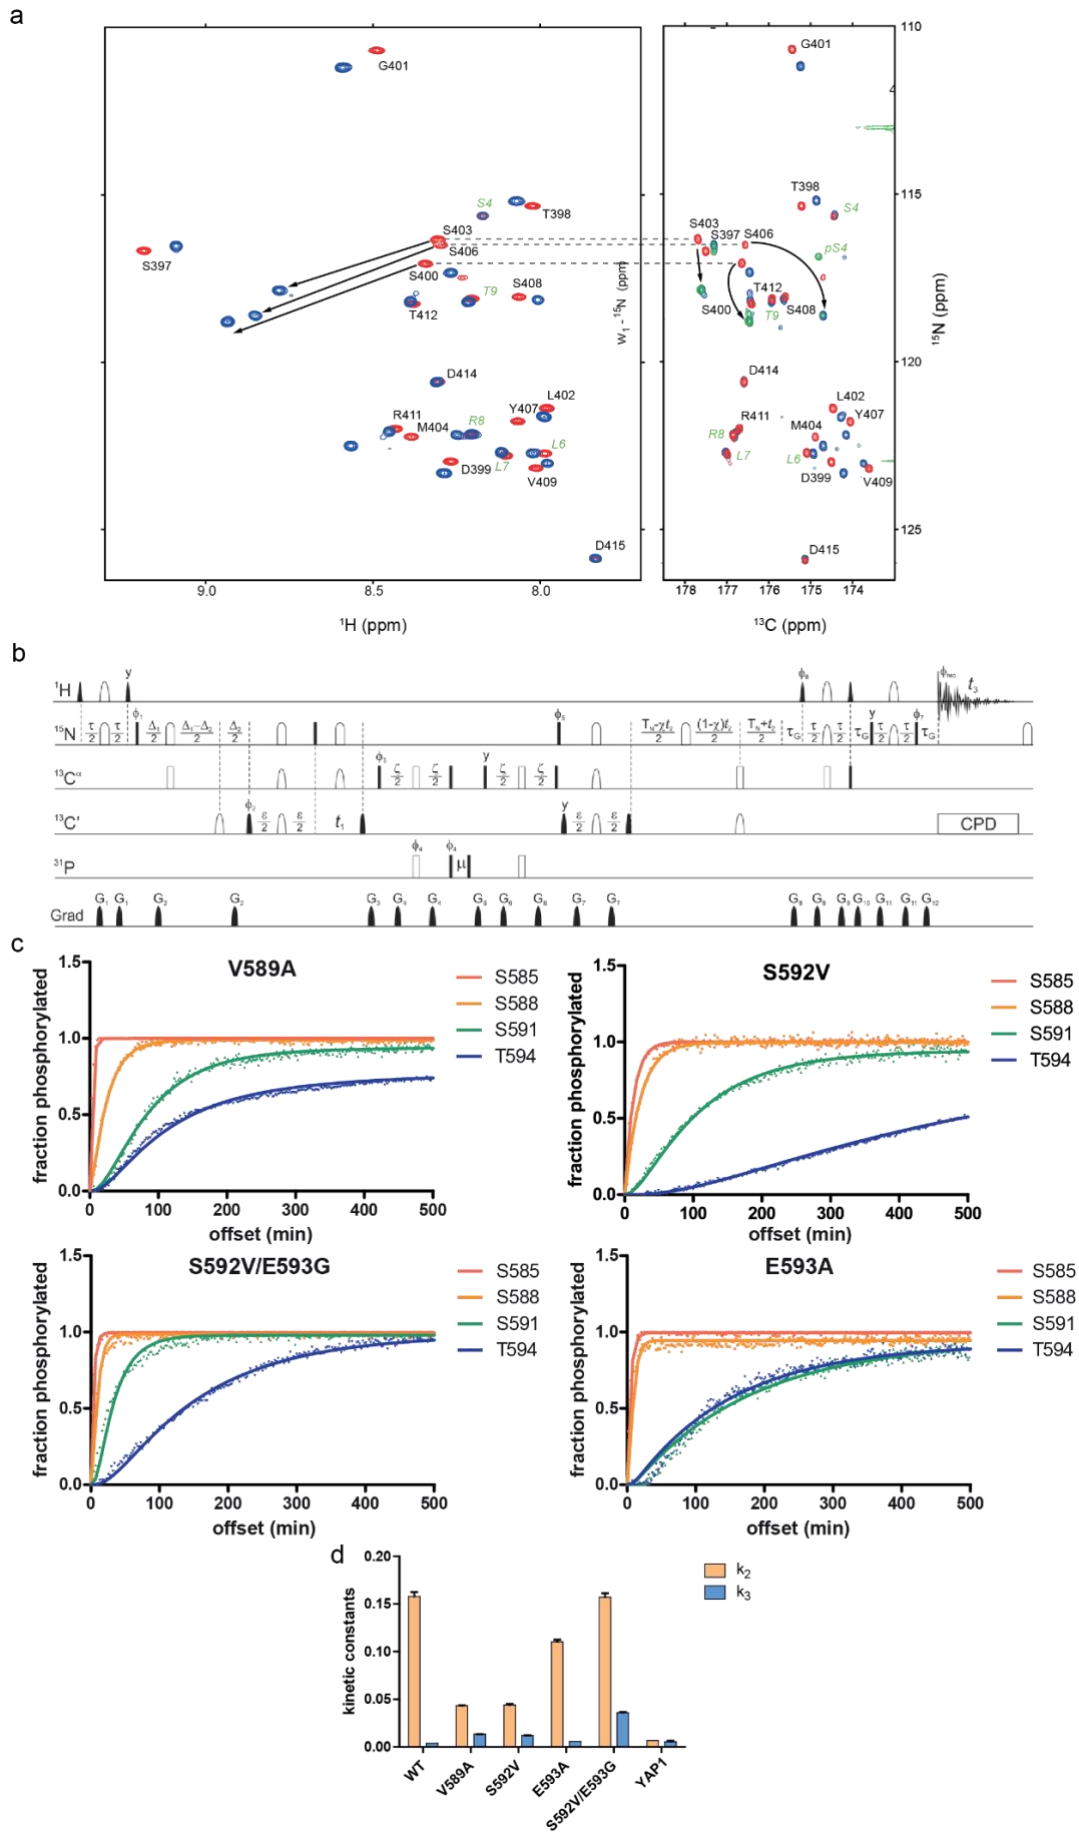

1003

1004

Supplementary Fig. 3

1005 **a**, Comparison of 2D HSQC (left) and 2D  $^{13}\text{C}$ -detected NCO (right) planes. In the  
1006 mono-phosphorylated state (red) S403 and S406 are almost completely degenerated in the  
1007 HSQC while in the (H)NCO they can be completely resolved. In the fully phosphorylated case  
1008 (blue) all peaks can be resolved in the HSQC as well as in the (H)NCO. To determine which  
1009 residues are indeed phosphorylated a 2D projection (NCO plane) of the experiment described  
1010 below was used. The resulting projection is shown as green overlay in the right panel. **b**,  
1011 Experimental scheme of the 3D [ $^{15}\text{N}$ ,  $^1\text{H}$ ]-BEST-TROSY-COintraHN(CAP) experiment.  
1012 Radiofrequency (RF) pulses with flip angles of  $90^\circ$  and  $180^\circ$  are represented by filled and open  
1013 symbols, respectively. Offsets for  $^1\text{H}$ ,  $^{15}\text{N}$ ,  $^{13}\text{C}^\alpha$ ,  $^{13}\text{C}'$ , and  $^{31}\text{P}$  are 8.7, 118.5, 56.7, 176.7, and  
1014 3.5 ppm, respectively. The initial two proton  $90^\circ$  pulses have a PC9 shape, the third and fourth  
1015 use time-reversed E-BURP-2 and regular E-BURP-2 shapes, respectively, and a RE-BURP  
1016 shape is employed for  $^1\text{H}$   $180^\circ$  pulses. Bandwidths of all proton pulses are adjusted to 4 ppm.  
1017 Rectangular  $^{15}\text{N}$   $90^\circ$  pulses are applied with the highest available power, while  $180^\circ$  flip angles  
1018 are achieved with broadband inversion pulses (BIPs) of 0.7 ms duration, except for the last  
1019 one before acquisition, which uses of RE-BURP shape with a bandwidth of 40 ppm.  
1020 Carbonyl-selective pulses (both  $90$  and  $180^\circ$ ) of 0.103 ms duration (at 700 MHz spectrometer  
1021 frequency) have an amplitude envelope corresponding to the center lobe of a  $\sin(x)/x$  function.  
1022 Rectangular pulses on  $\alpha$ -carbons are applied off-resonance using phase modulation with an  
1023 RF field of  $v/15^{1/2}$  for  $90^\circ$  flip angle and  $v/3^{1/2}$  for  $180^\circ$  flip angle, where  $v$  is the difference  
1024 between  $^{13}\text{C}^\alpha$  and  $^{13}\text{C}'$  offsets in Hz. The simultaneous  $180^\circ$  pulses on  $\alpha$ - and carbonyl carbons  
1025 in the center of  $\varepsilon$  periods are implemented as double-band RE-BURPs with  
1026 inversion/refocusing bands of ca. 16 ppm ( $\text{C}'$  region) and ca. 22 ppm ( $\text{C}^\alpha$  region), separated  
1027 by 120 ppm. Delay durations are as follows:  $\tau = 5.4$  ms,  $\Delta_1 = 38$  ms,  $\Delta_2 = 33$  ms,  $\varepsilon = 9$  ms,  $\zeta =$   
1028  $55$  ms,  $\mu = 0.003$  ms,  $T_N = 33$  ms, and  $\tau_G = 0.39$  ms. The  $t_2$  evolution time is implemented in a  
1029 semi-constant time manner where  $X = T_N/t_{2,\text{max}}$ . The default RF pulse phase is  $x$ . Phase cycling:  
1030  $\Phi_1 = 16(y), 16(-y)$ ;  $\Phi_2 = 4(y), 4(-y)$ ;  $\Phi_3 = x, -x$ ;  $\Phi_4 = 2(x), 2(-x)$ ;  $\Phi_5 = 8(x), 8(-x)$ ;  $\Phi_{\text{rec}} = X, 2(-$   
1031  $X), X, -X, 2(X), -X$ , where  $X = x, 2(-x), x$ . Pulsed field gradients along the  $z$ -axis have a sine-bell  
1032 shape and durations of 0.3 ms ( $G_1$ - $G_7$  and  $G_9$ ), 0.175 ms ( $G_8, G_{10}$ , and  $G_{12}$ ), and 1.0 ms ( $G_{11}$ ),  
1033 respectively. Peak amplitudes are  $G_1$ : -10 % (percentage of maximum available gradient  
1034 strength);  $G_2$ : -9 %;  $G_3$ : -15 %;  $G_4$ : -12 %;  $G_5$ : 12%;  $G_6$ : -14 %;  $G_7$ : 8 %;  $G_9$ : -28 %;  $G_{11}$ : 65 %.  
1035 Coherence selection is achieved by gradients  $G_8, G_{10}$ , and  $G_{12}$  that are applied with amplitudes  
1036 (-70 %, 30 %, 19.87 %) and (-80 %, 20 %, 30.13 %) to record N- and P-type transients,  
1037 respectively. For each  $t_2$  increment both types are collected alternately by changing pulse  
1038 phases  $\Phi_6$  from  $y$  to  $-y$  and  $\Phi_7$  from  $x$  to  $-x$ . The two FIDs are stored separately and then  
1039 added and subtracted to form the real and imaginary parts of a complex data point with a  $90^\circ$   
1040 zero-order phase shift being added to one of the components. Phase  $\Phi_5$  is inverted along with  
1041 the receiver reference phase in every other increment to shift axial peaks to the edge of the



1042 spectrum in the  $^{15}\text{N}$  dimension. Quadrature in the  $^{13}\text{C}$  dimension was achieved by applying  
1043 States-TPPI to  $\Phi_2$ . **c**, Phosphorylation kinetics of selected PAD mutants showing a reduction  
1044 in the kinetic difference between S588 and S591. **d**, Measured kinetic constants for the  
1045 phosphorylation of S588 ( $k_2$ ) and S591 ( $k_3$ ) in wild type and different mutant PAD peptides as  
1046 well as the constants for the second and third phosphorylation event in the YAP1 peptide.



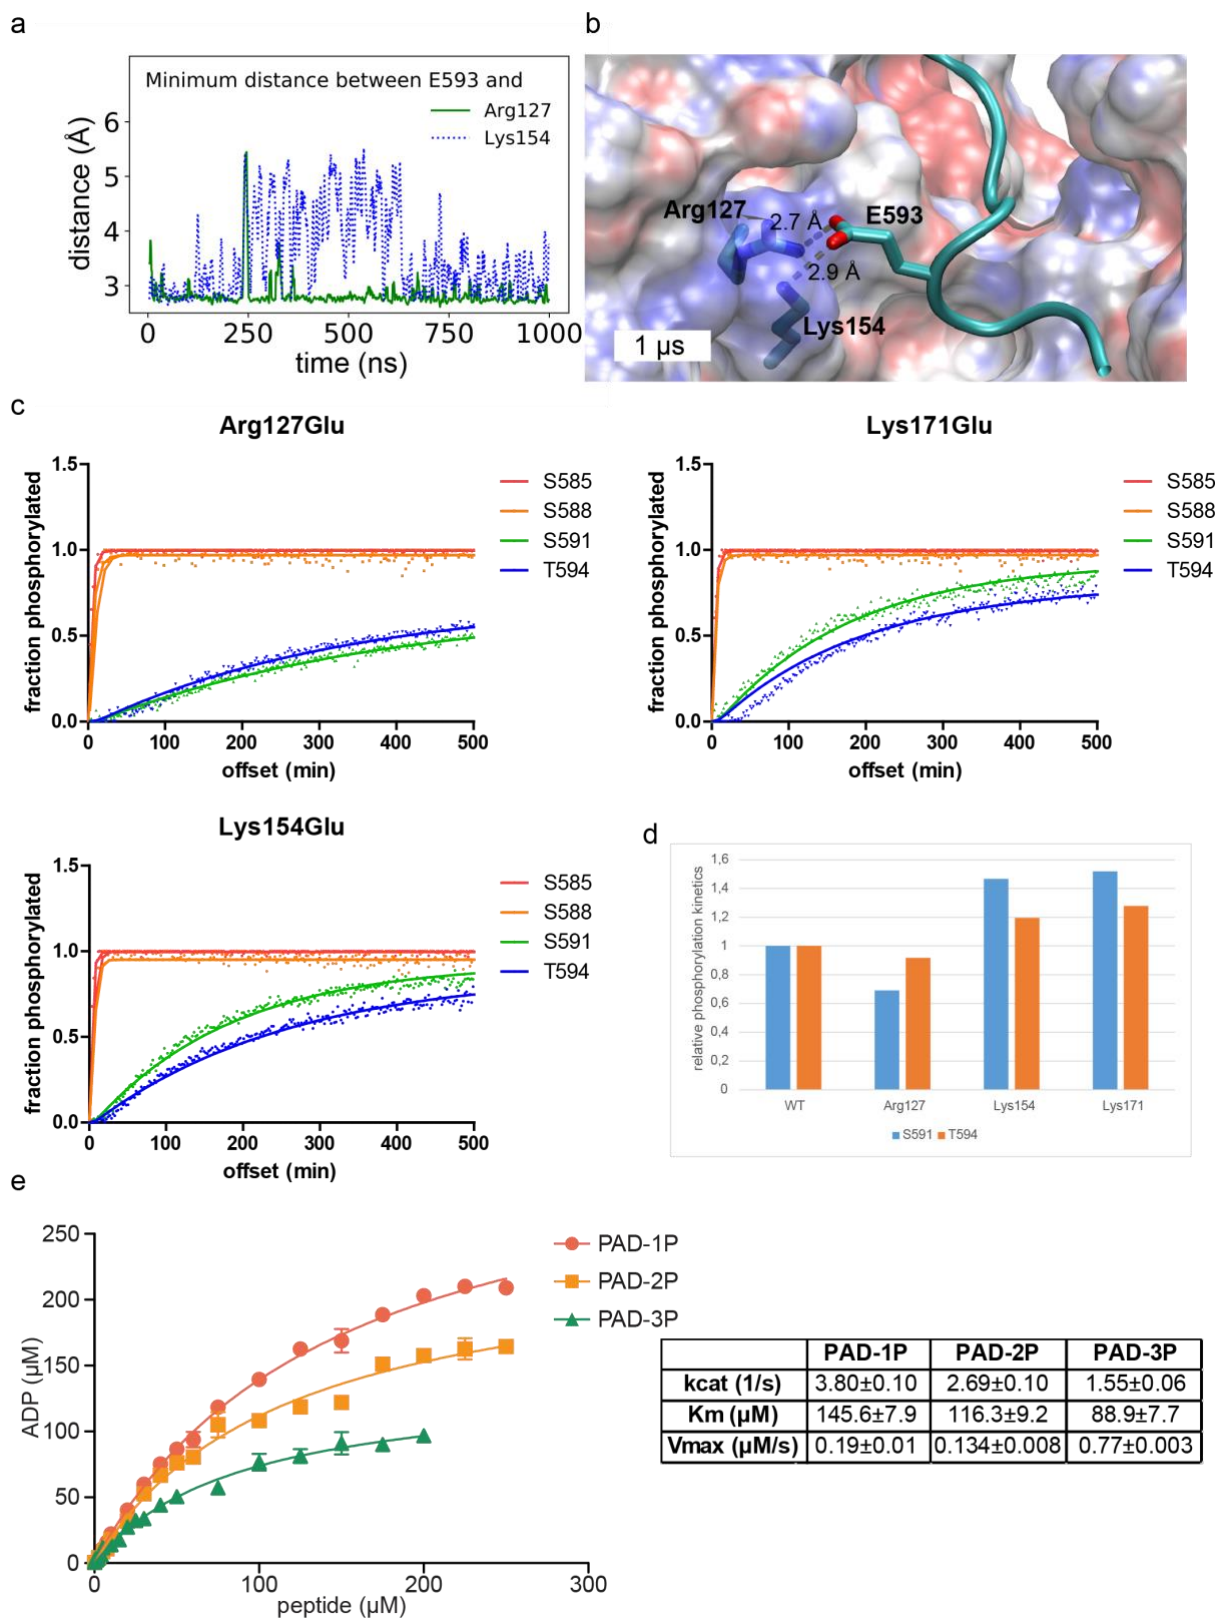

1052

1053 **Supplementary Fig. 5**

1054 **a**, MD simulation of CK1 in complex with a shorter PAD-3P peptide (ACE-  
 1055 TPsSSApSTVpSVGSSETRG-NME) with N-terminal acetyl and C-terminal methylamino  
 1056 capping groups showing similar results as the longer peptide (Fig. 5a and 5b). **b**, Snapshot at

1057 1  $\mu$ s, zooming in on the C-terminal region of the shorter p63 peptide. CK1 is shown as  
1058 transparent electrostatic surface (blue/red for positive/negative charge) and the p63 peptide is  
1059 represented as cyan cartoon. The residues E593, Arg127 and Lys154 are highlighted. The  
1060 minimum distances between E593 and the basic residues are indicated. **c**, Phosphorylation  
1061 kinetics of selected CK1 $\delta$  mutants showing a reduction in the kinetic difference between S588  
1062 and S591 compared to the wild type kinase. **d**, Relative phosphorylation kinetics of the mutants  
1063 described in **a**, normalized on wild type kinase. Mutation of Lys154Glu shows the strongest  
1064 difference in phosphorylation kinetics for T594 while the difference is largest for S591 in case  
1065 of a Lys171Glu mutation. **e**, Determination of  $K_M$ ,  $v_{max}$  and  $k_{cat}$  for mono-, di- and tri-  
1066 phosphorylated PAD peptides. The assay was performed in triplicates, the indicated error  
1067 represents the standard deviation.

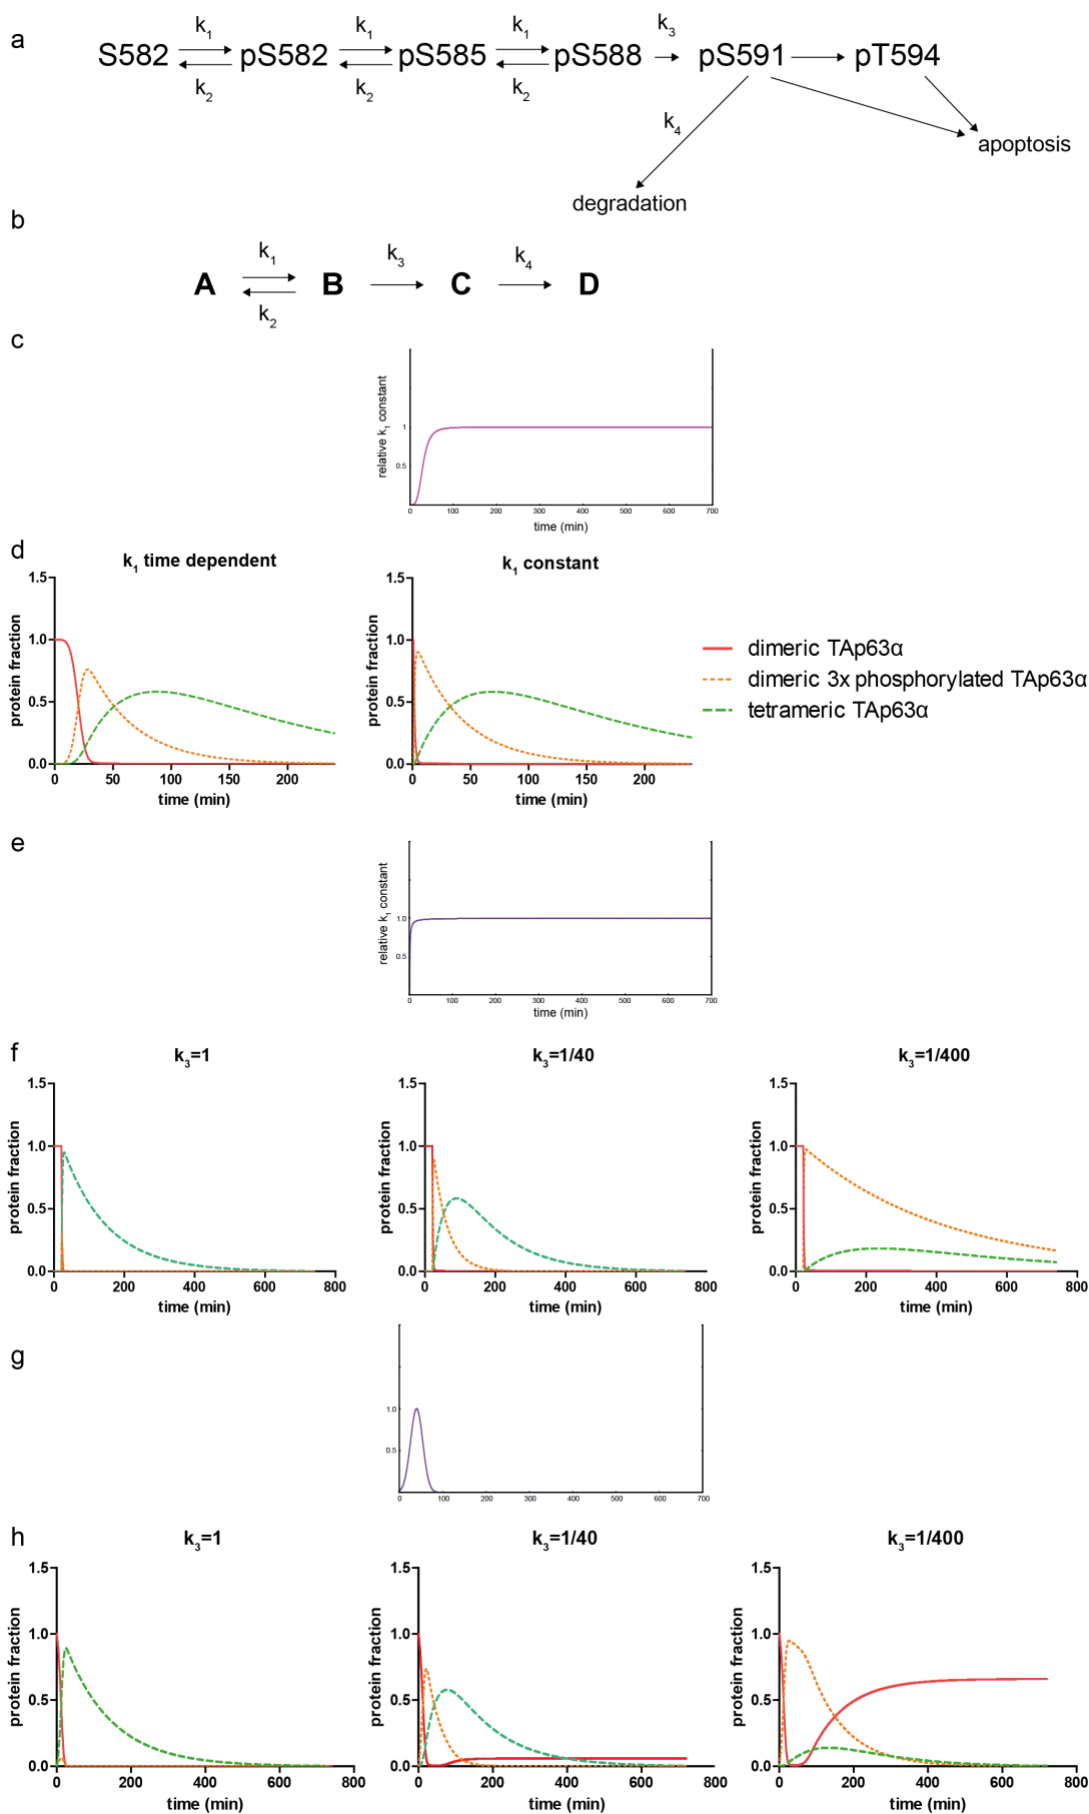

1068

1069

Supplementary Fig. 6

1070 **a**, Simplified kinetic model of the activation of TAp63 $\alpha$ . Upon DNA damage TAp63 $\alpha$  is modified  
1071 by CHK2 kinase and subsequently by CK1. For this model it is assumed that the initial CHK2  
1072 phosphorylation events as well as the first two CK1 modifications are fast and can therefore  
1073 be summarized into a single kinetic constant  $k_1$ . The hypothetical activity of phosphatases  
1074 counteracting the phosphorylation at this point is described as  $k_2$ . The decisive phosphorylation  
1075 of S591 is described by  $k_3$  and the competitive reaction to apoptosis, namely degradation of  
1076 the tetrameric protein, is described as  $k_4$ . **b**, Further simplified diagram of the kinetic model  
1077 described in **a**. **c**, Plot of the time dependent function used to model the initial DNA damage  
1078 response ( $k_1$ ). **d**, Comparison of time dependent  $k_1$  as used in the model and a constant  $k_1$ .  
1079 **e**, Plot of an alternative, hyperbolic  $k_1$  used for simulated kinetics shown in **f**. **f**, Influence on  
1080 different  $k_3$  kinetic constants on the formation of tetrameric protein under a hyperbolic  $k_1$ . The  
1081 start of the kinetics has been artificially set to 20 min to account for the experimentally observed  
1082 lag after  $\gamma$ -irradiation of ovaries. **g**, Plot of an alternative, Gaussian  $k_1$  used for simulated  
1083 kinetics shown in panel **f**. **h**, Influence on different  $k_3$  kinetic constants on the formation of  
1084 tetrameric protein under a Gaussian  $k_1$

1085 **Supplementary Table 1. Kinetic constants derived from the NMR based phosphorylation**  
1086 **experiments**

| peptide     | k <sub>1</sub> | k <sub>2</sub> | k <sub>3</sub> | k <sub>4</sub> |  | k <sub>2</sub> /WT k <sub>2</sub> | k <sub>3</sub> /WT k <sub>3</sub> | k <sub>2</sub> /k <sub>3</sub> |
|-------------|----------------|----------------|----------------|----------------|--|-----------------------------------|-----------------------------------|--------------------------------|
| WT          | 0.2688         | 0.1581         | 0.0038         | 0.0033         |  | 1.00                              | 1.00                              | 41.99                          |
| V589A       | 0.3002         | 0.0434         | 0.0134         | 0.0099         |  | 0.27                              | 3.55                              | 3.24                           |
| S592V       | 0.0797         | 0.0441         | 0.0120         | 0.0020         |  | 0.28                              | 3.18                              | 3.69                           |
| E593A       | 0.2147         | 0.1103         | 0.0057         | 0.0067         |  | 0.70                              | 1.52                              | 19.26                          |
| S592V/E593G | 0.2639         | 0.1573         | 0.0359         | 0.0719         |  | 0.99                              | 9.55                              | 4.38                           |
| YAP         | 0.0072         | 0.0066         | 0.0054         | -              |  | 0.04                              | 1.43                              | 1.23                           |

1087

1088 **Supplementary Table 2. Data collection and refinement statistics.**

| Complex                                                     | CK1δ-PAD-1P-AMPPCP                                                                      | CK1δ-PAD-2P-ADP                                                                         | CK1δ-PAD-3P-ADP                                                                                      |
|-------------------------------------------------------------|-----------------------------------------------------------------------------------------|-----------------------------------------------------------------------------------------|------------------------------------------------------------------------------------------------------|
| PDB accession code                                          | 6RU6                                                                                    | 6RU7                                                                                    | 6RU8                                                                                                 |
| <b>Data Collection</b>                                      |                                                                                         |                                                                                         |                                                                                                      |
| Resolution <sup>a</sup> (Å)                                 | 49.26-2.05 (2.12-2.05)                                                                  | 46.60-2.08 (2.19-2.08)                                                                  | 48.84-1.92 (1.99-1.92)                                                                               |
| Spacegroup                                                  | C2                                                                                      | C2                                                                                      | P1                                                                                                   |
| Cell dimensions                                             | $a = 171.9, b = 48.9, c = 85.2$ Å<br>$\alpha, \gamma = 90.0^\circ, \beta = 109.7^\circ$ | $a = 171.8, b = 48.7, c = 87.6$ Å<br>$\alpha, \gamma = 90.0^\circ, \beta = 109.9^\circ$ | $a = 48.7, b = 84.1, c = 89.3$ Å<br>$\alpha = 108.6^\circ, \beta = 105.8^\circ, \gamma = 97.6^\circ$ |
| No. unique reflections <sup>a</sup>                         | 42,000 (4,126)                                                                          | 41,053 (5,997)                                                                          | 90,338 (8,819)                                                                                       |
| Completeness <sup>a</sup> (%)                               | 99.4 (99.5)                                                                             | 99.3 (99.6)                                                                             | 92.2 (91.5)                                                                                          |
| I/ $\sigma$ <sup>a</sup>                                    | 8.3 (2.0)                                                                               | 8.6 (2.0)                                                                               | 7.2 (2.1)                                                                                            |
| R <sub>merge</sub> <sup>a</sup> (%)                         | 0.108 (0.705)                                                                           | 0.106 (0.771)                                                                           | 0.079 (0.550)                                                                                        |
| CC (1/2)                                                    | 0.996 (0.837)                                                                           | 0.996 (0.865)                                                                           | 0.994 (0.843)                                                                                        |
| Redundancy <sup>a</sup>                                     | 5.0 (5.1)                                                                               | 6.0 (6.2)                                                                               | 3.9 (3.9)                                                                                            |
| <b>Refinement</b>                                           |                                                                                         |                                                                                         |                                                                                                      |
| No. atoms in refinement (CK1/PAD/Lig/Other) <sup>b</sup>    | 4,671/53/62/177                                                                         | 4,776/203/54/297                                                                        | 9,595/295/108/614                                                                                    |
| B factor (CK1/PAD/Lig/Other) <sup>b</sup> (Å <sup>2</sup> ) | 50/79/81/53                                                                             | 42/70/41/51                                                                             | 37/54/33/45                                                                                          |
| R <sub>fact</sub> (%)                                       | 21.1                                                                                    | 17.5                                                                                    | 17.2                                                                                                 |
| R <sub>free</sub> (%)                                       | 25.7                                                                                    | 21.8                                                                                    | 21.1                                                                                                 |
| rms deviation bond <sup>c</sup> (Å)                         | 0.012                                                                                   | 0.014                                                                                   | 0.013                                                                                                |
| rms deviation angle <sup>c</sup> (°)                        | 1.3                                                                                     | 1.3                                                                                     | 1.3                                                                                                  |
| <b>Molprobrity</b>                                          |                                                                                         |                                                                                         |                                                                                                      |
| <b>Ramachandran</b>                                         |                                                                                         |                                                                                         |                                                                                                      |
| Favour (%)                                                  | 96.59                                                                                   | 97.27                                                                                   | 98.62                                                                                                |
| Disallowed (%)                                              | 0                                                                                       | 0                                                                                       | 0                                                                                                    |
| <b>Molprobrity score</b>                                    | 1.43 (98 <sup>th</sup> percentile)                                                      | 1.28 (99 <sup>th</sup> percentile)                                                      | 1.13 (100 <sup>th</sup> percentile)                                                                  |
| PAD peptide sequence used in soaking                        | RTP(pS)SASTVSV<br>GY                                                                    | YTP(pS)SA(pS)TV<br>SVGSSET                                                              | (pS)SA(pS)TV(pS)<br>VGSSY                                                                            |

1089 <sup>a</sup> Values in brackets show the statistics for the highest resolution shells.

1090 <sup>b</sup> CK1/PAD/Lig/Other indicate CK1δ protein, p63 PAD peptides, ADP or AMPPCP ligand molecules, and other  
1091 (water and solvent molecules), respectively.

1092 <sup>c</sup> rms indicates root-mean-square.
